# Supplementary material for: Click Pt(IV)-Carbohydrates Pro-Drugs for Treatment of Osteosarcoma
Source: PubMed Central journal article supplement (PMC8688915; doi:10.3389/fchem.2021.795997), 2021-12-07
Supplement: DataSheet1.pdf [file DataSheet1.pdf]

# Supporting Information

## Click Pt(IV)-carbohydrates pro-drugs for treatment of osteosarcoma

Eoin Moynihan, Giada Bassi, Andrea Ruffini, Silvia Panseri, Monica Montesi<sup>2</sup> Trinidad Velasco Torrijos, Diego Montagner

NMR, HR-MS and HPLC

### Compound 9

<sup>1</sup>H NMR

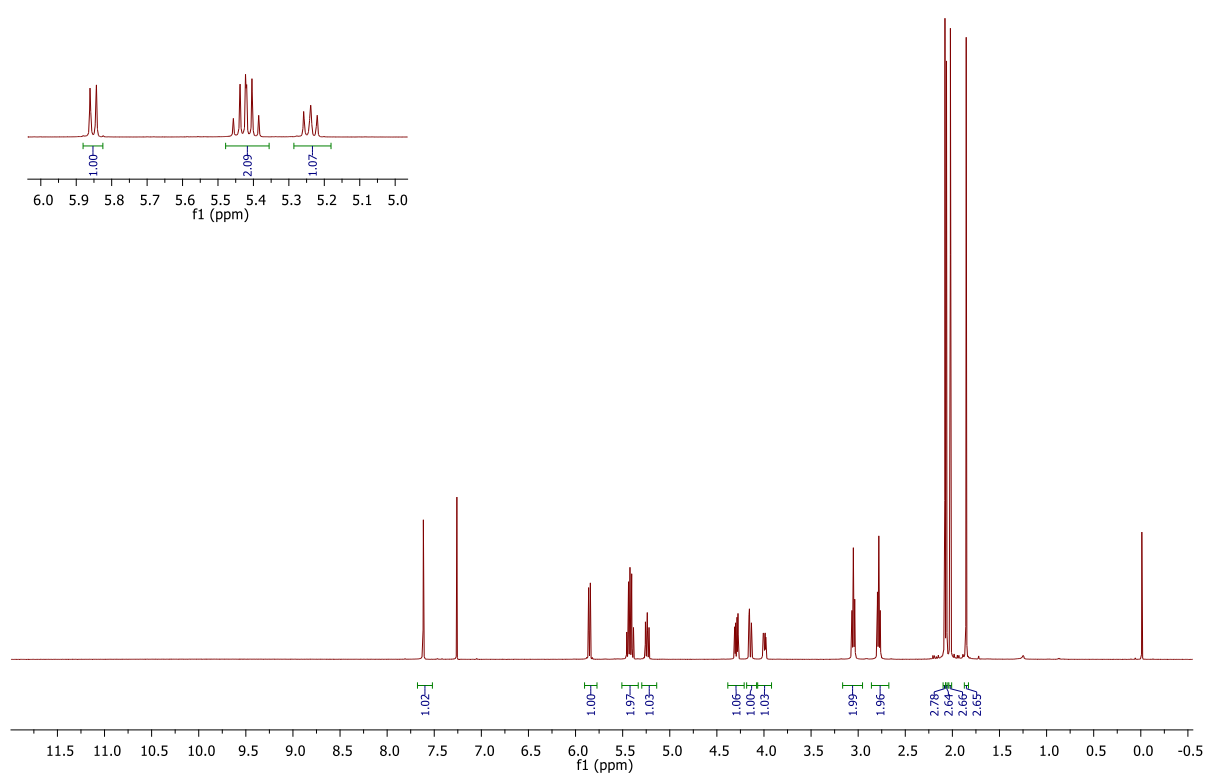

# $^{13}\text{C}$ NMR

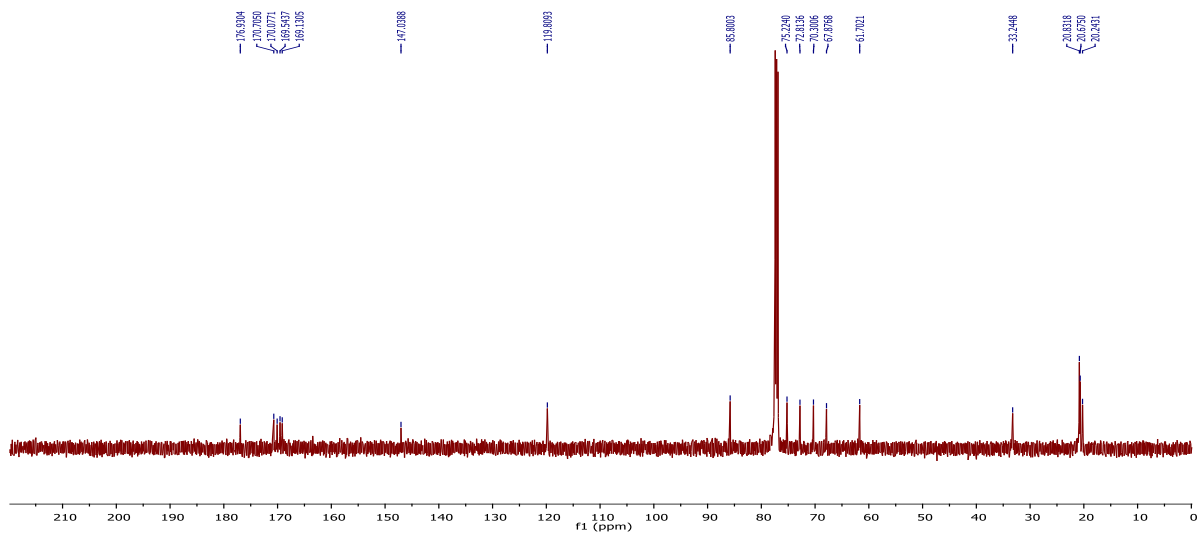

# COSY

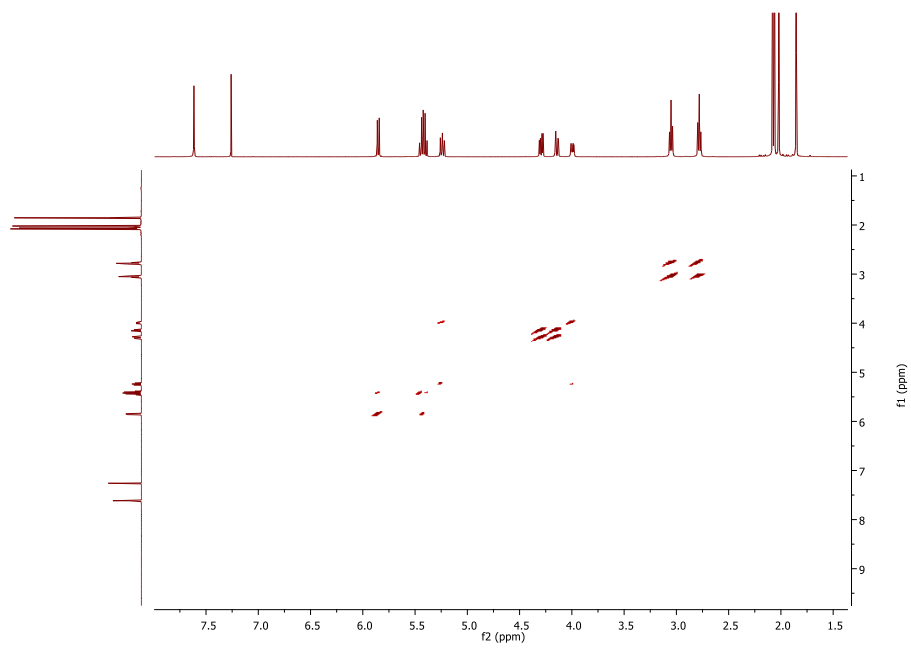

# HSQC

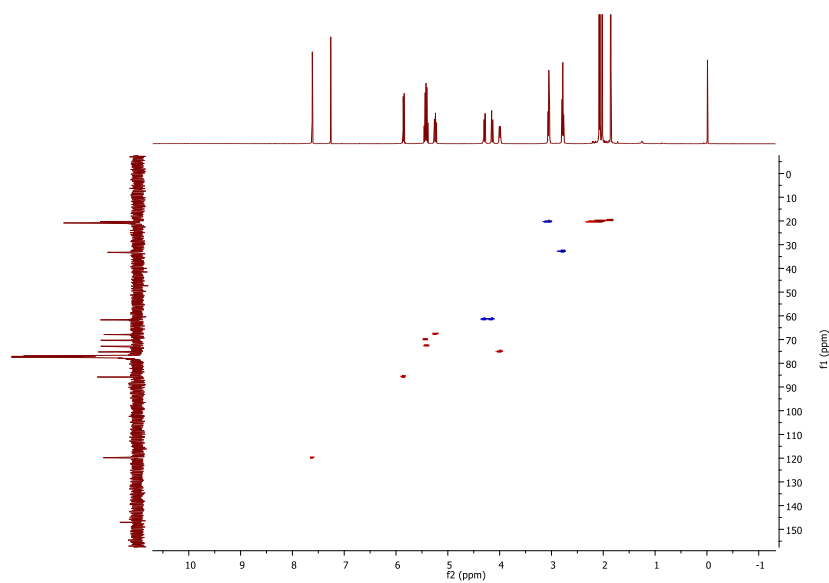

# HMBC

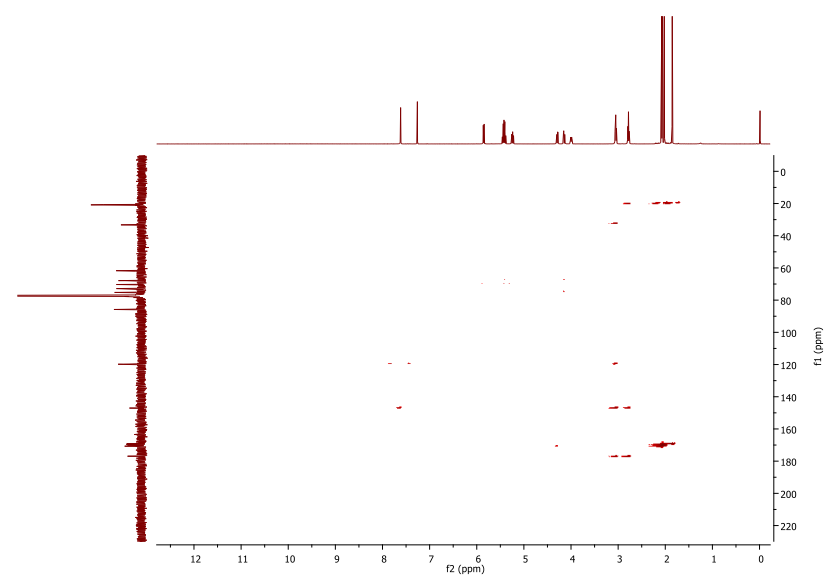

# HR-MS

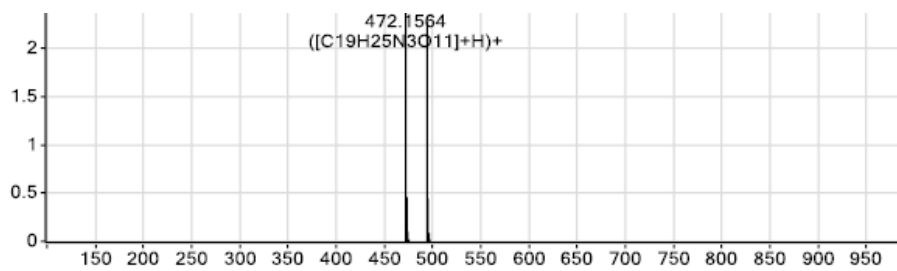

# Compound 10

## $^1\text{H}$ NMR

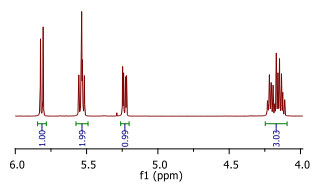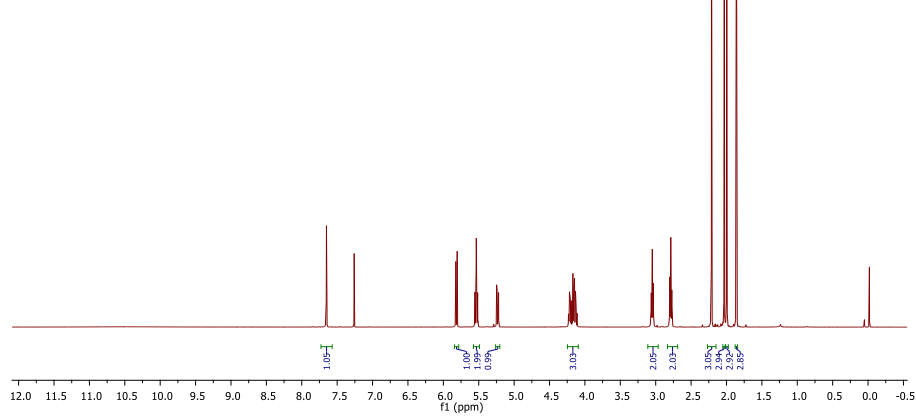

## $^{13}\text{C}$ NMR

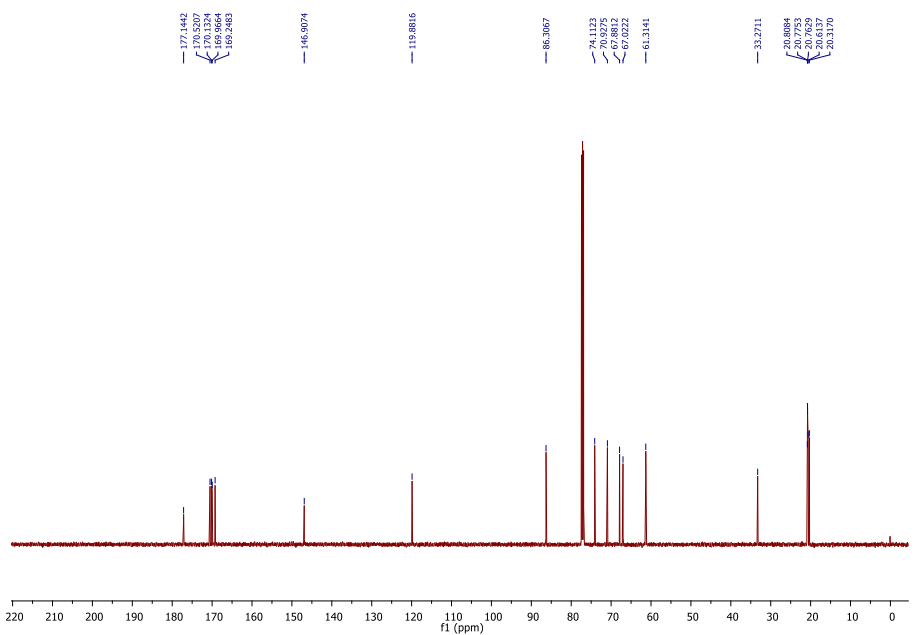

# COSY

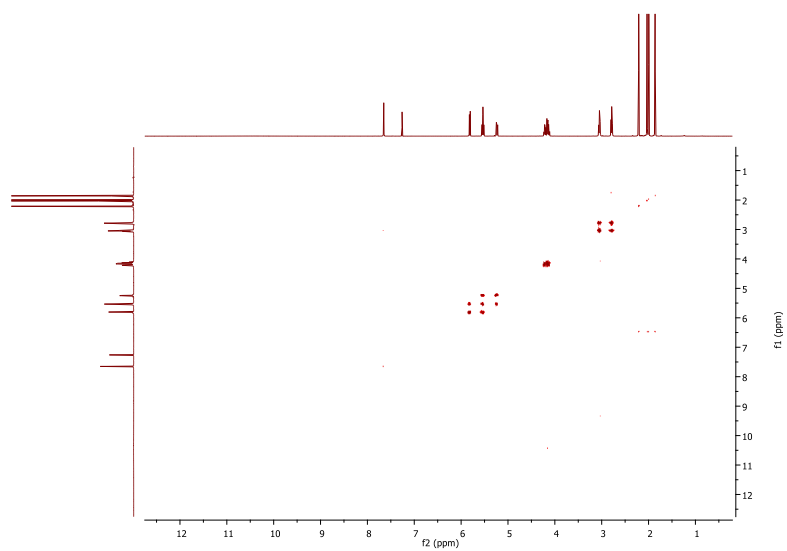

# HSQC

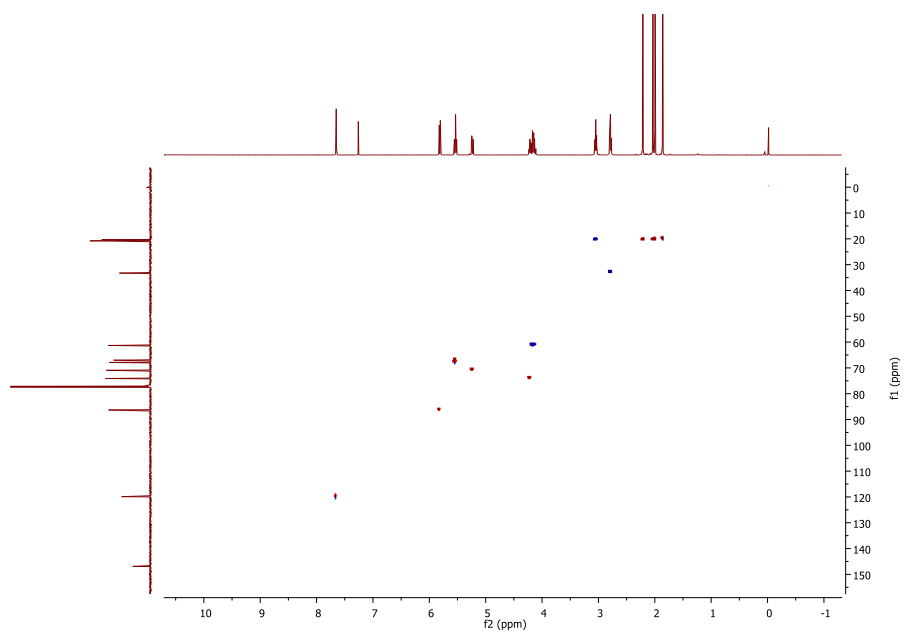

# HMBC

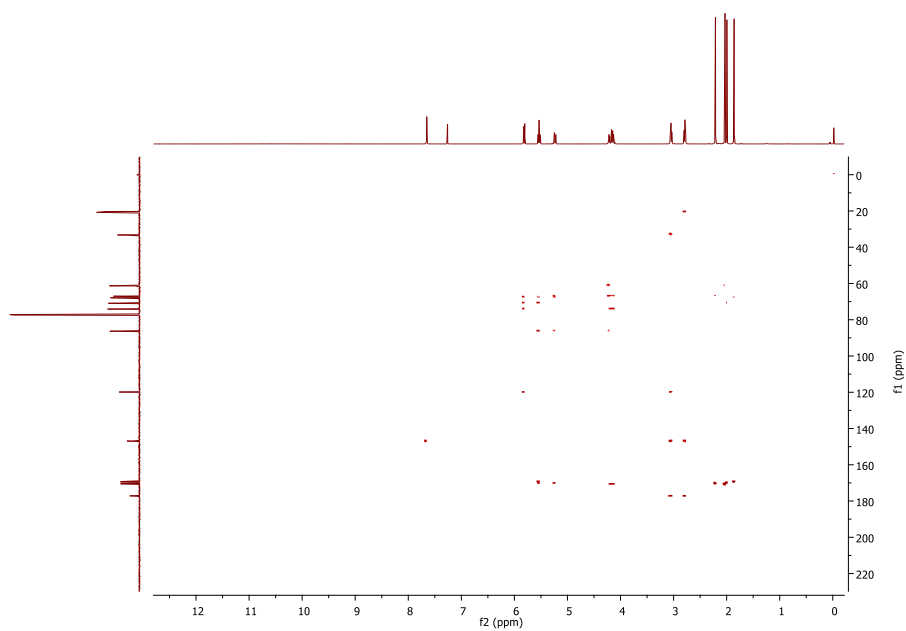

# HR-MS

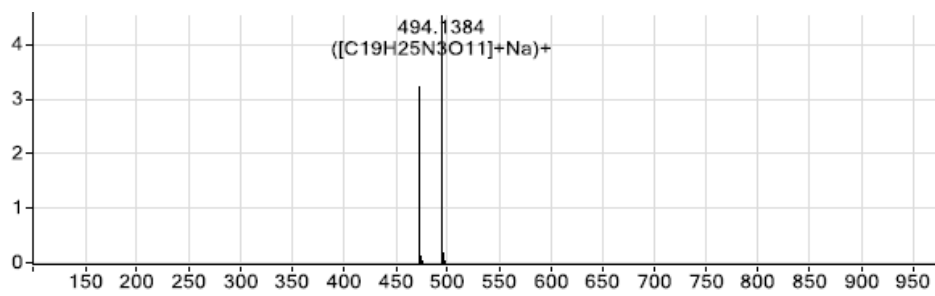

# Compound 17

## $^1\text{H}$ NMR

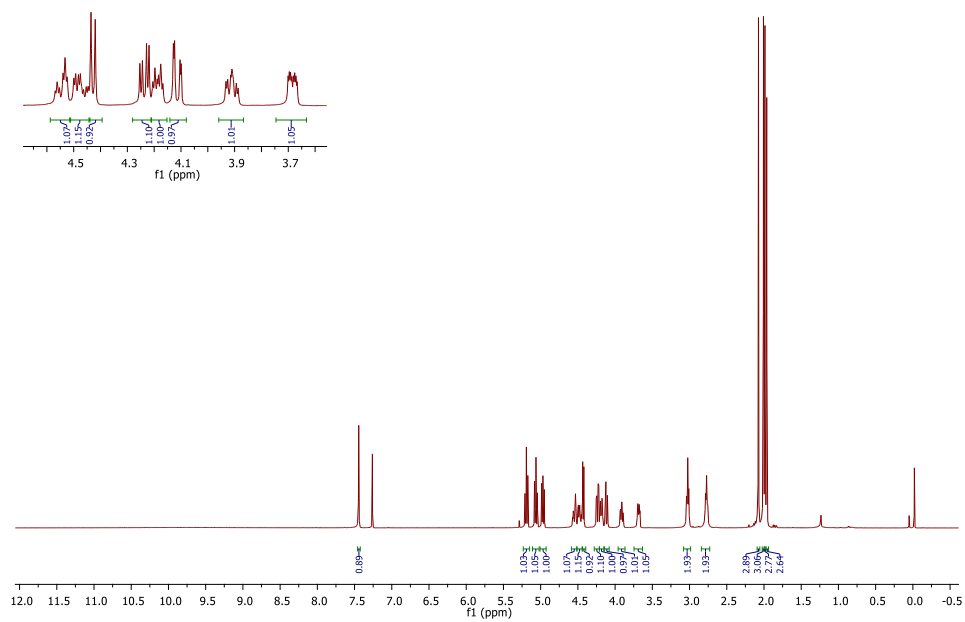

## $^{13}\text{C}$ NMR

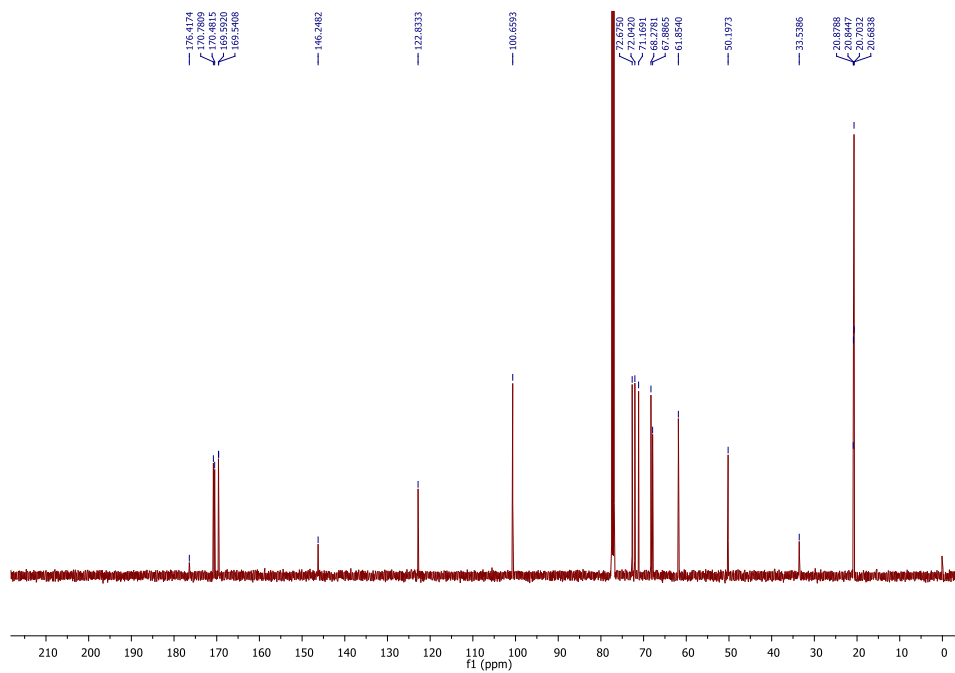

# COSY

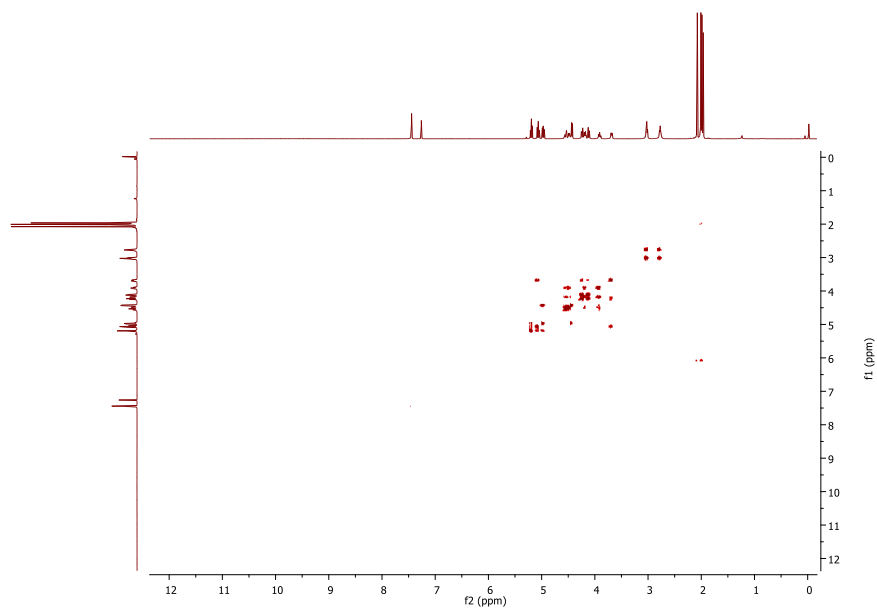

# HSQC

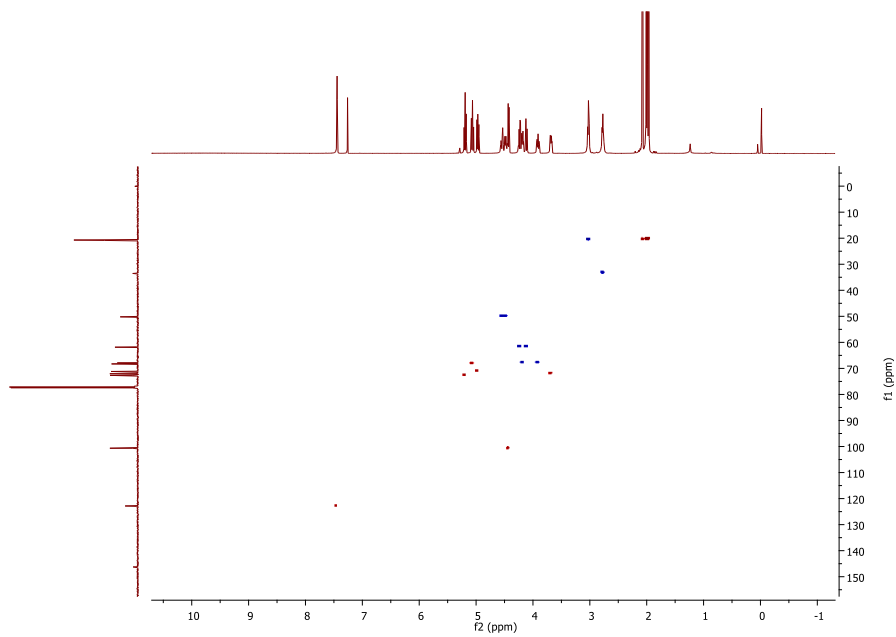



# HMBC

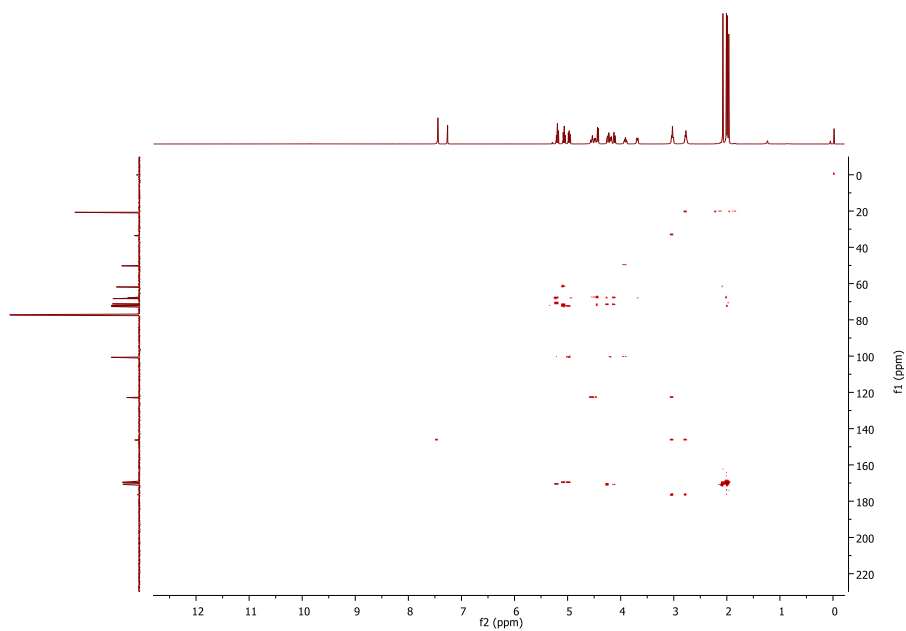

# HR-MS

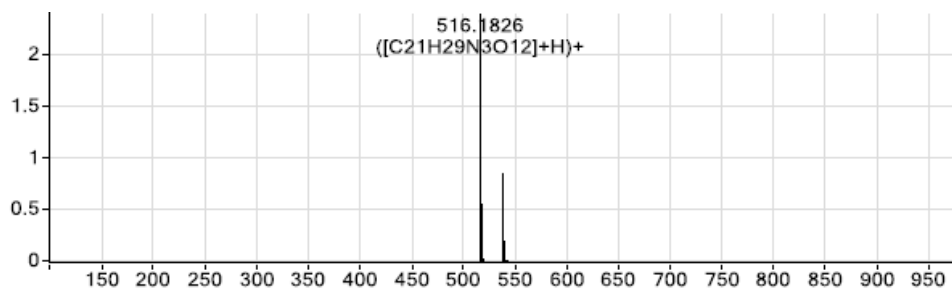

# Compound 18

## $^1\text{H}$ NMR

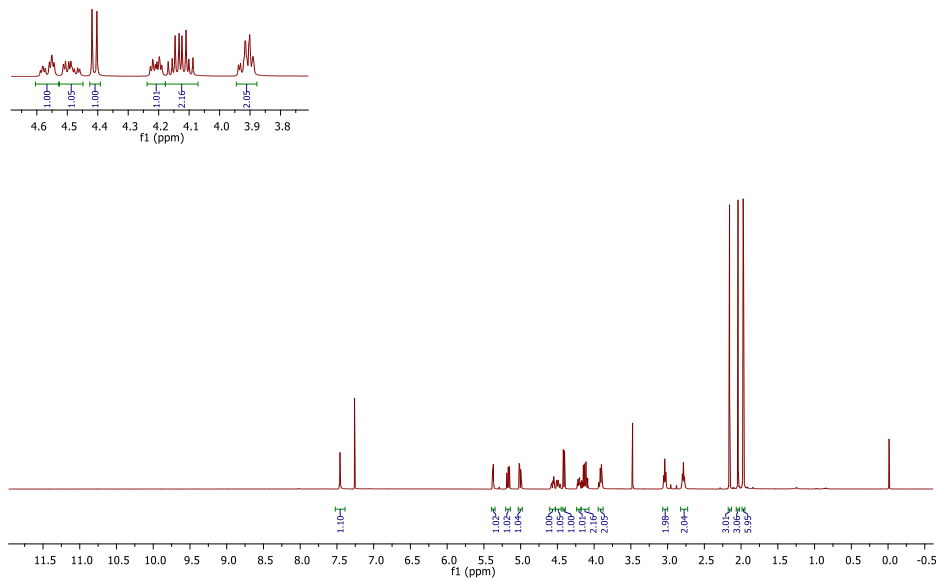

## $^{13}\text{C}$ NMR

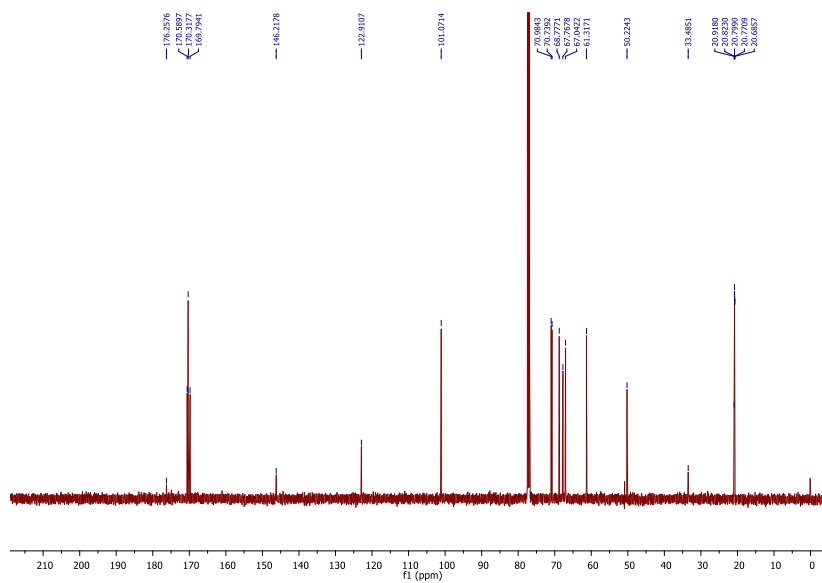

# COSY

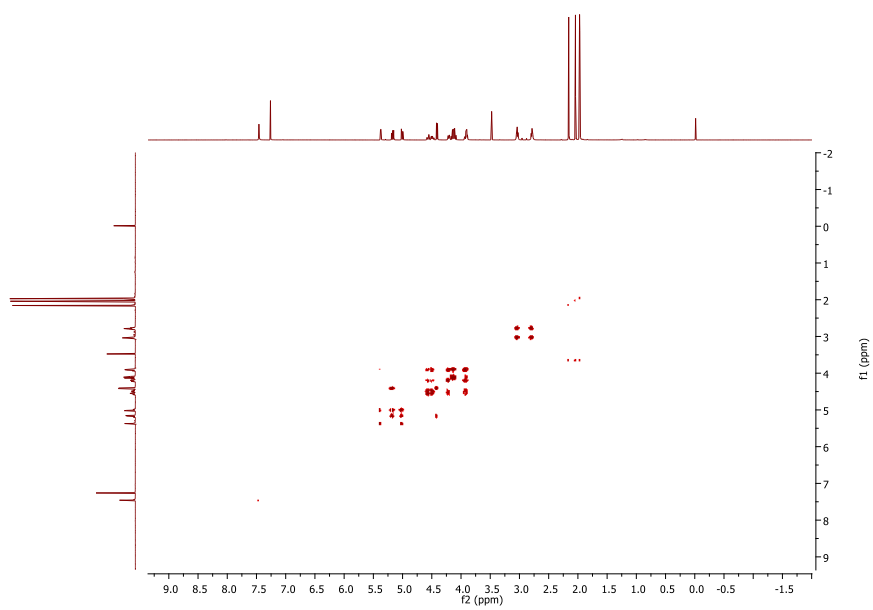

# HSQC

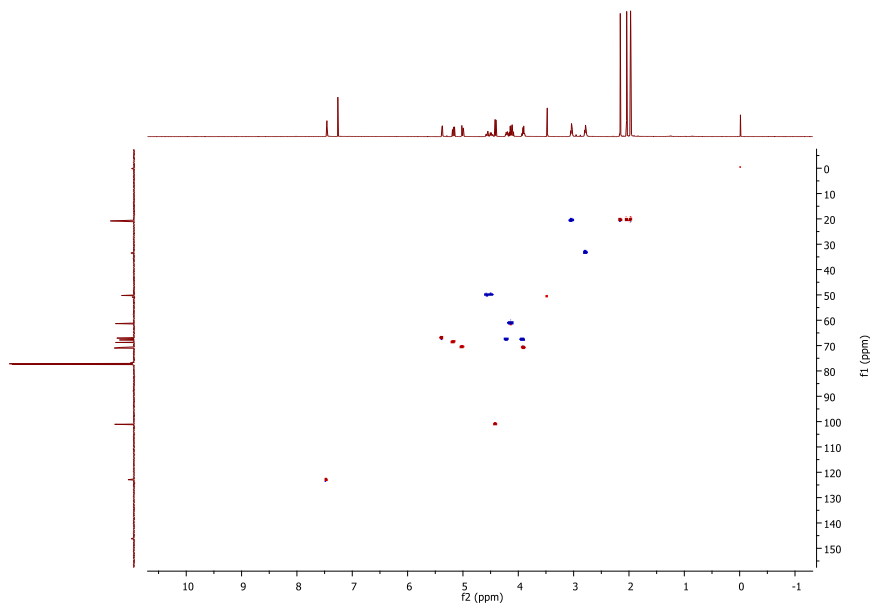

# HMBC

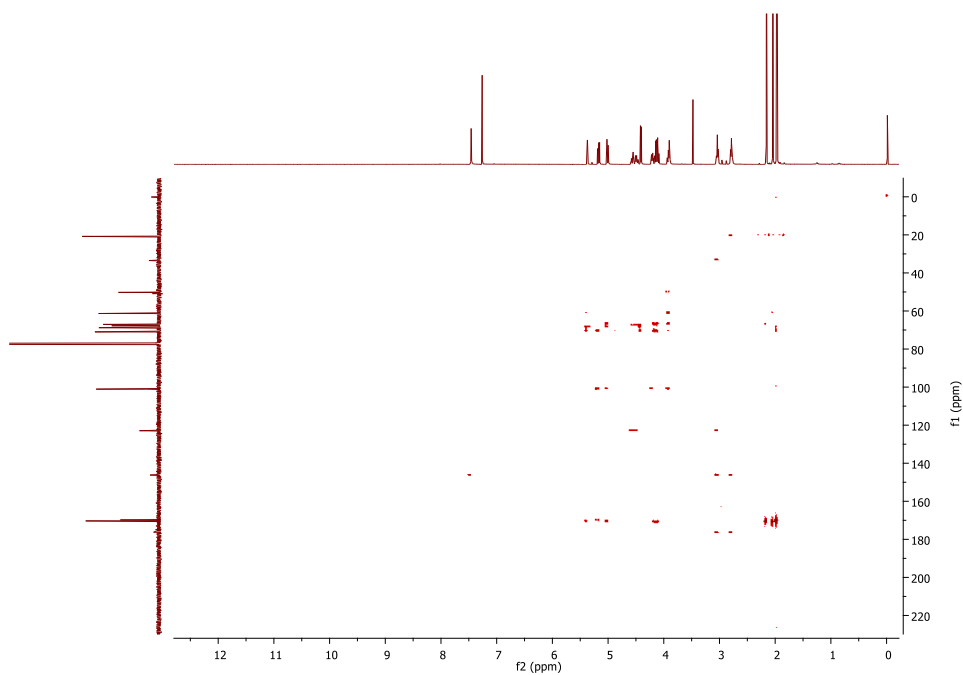

# HR-MS

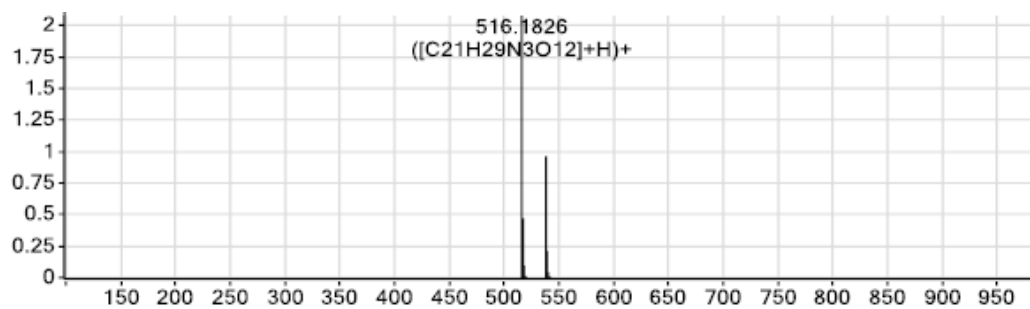

# Compound 11

## $^1\text{H}$ NMR

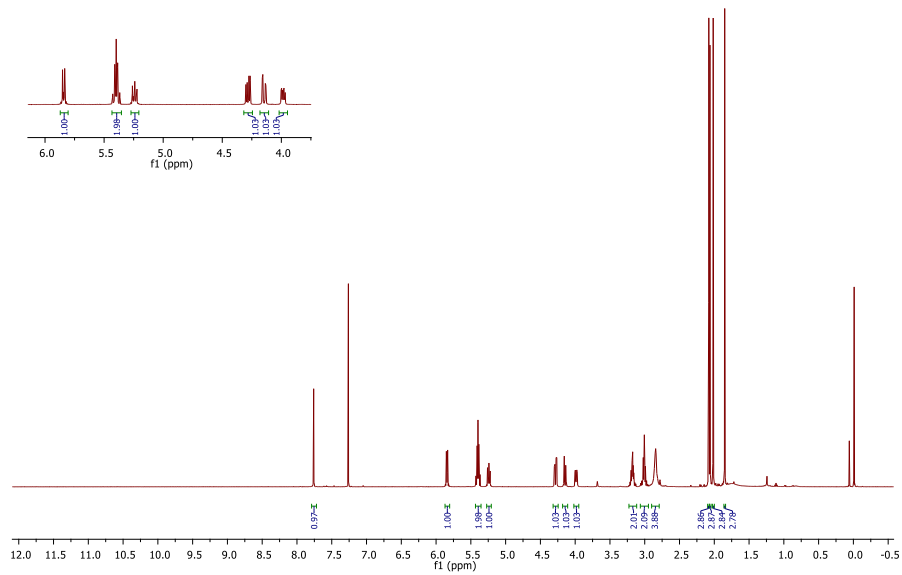

## $^{13}\text{C}$ NMR

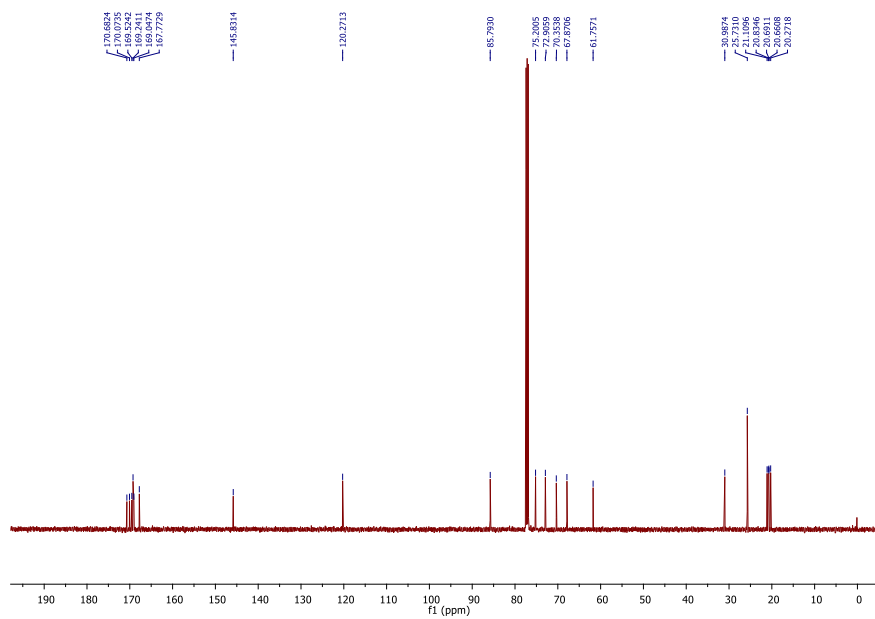

# COSY

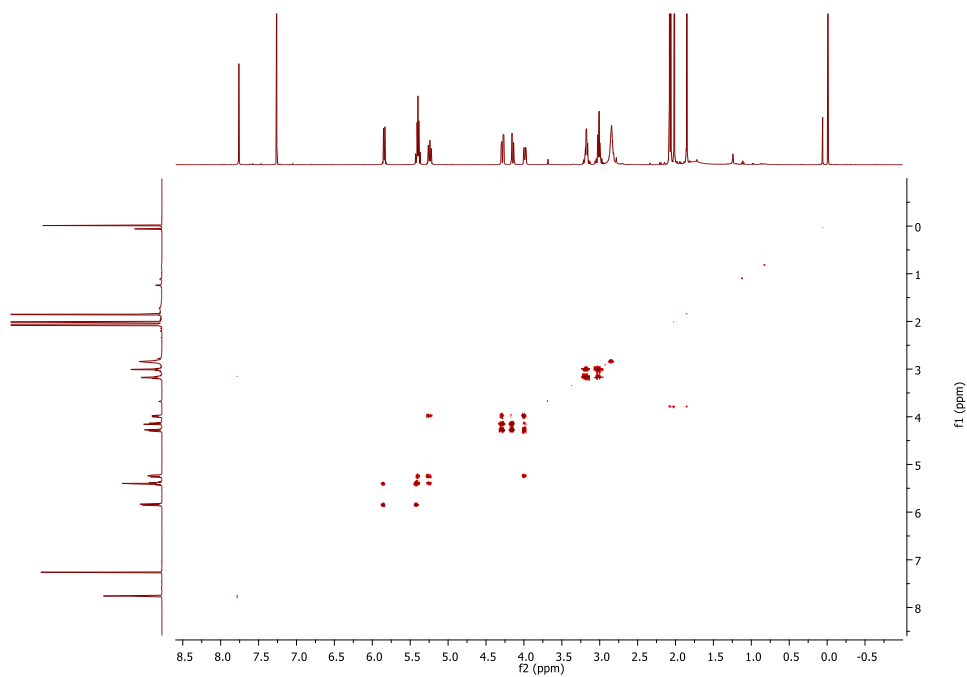

# HSQC

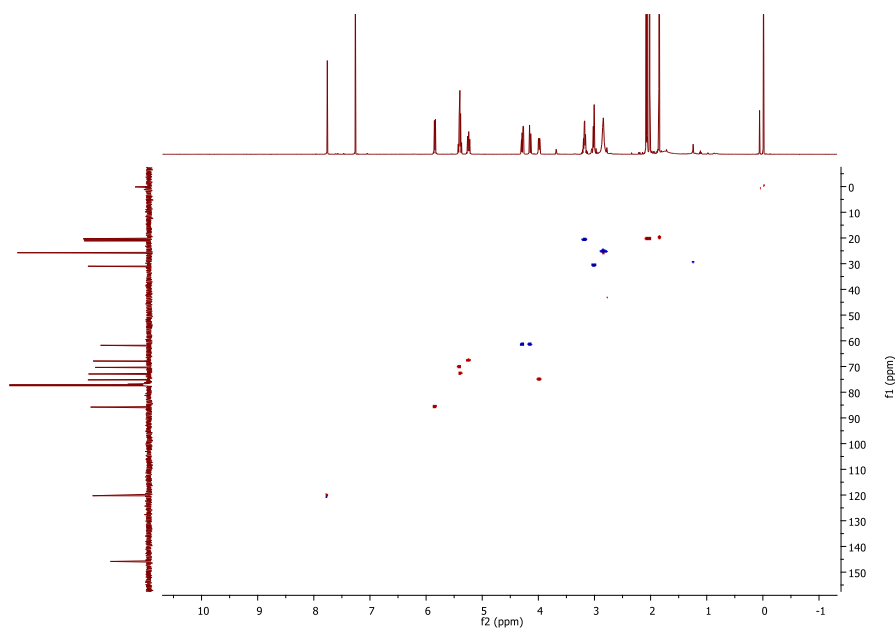

# HMBC

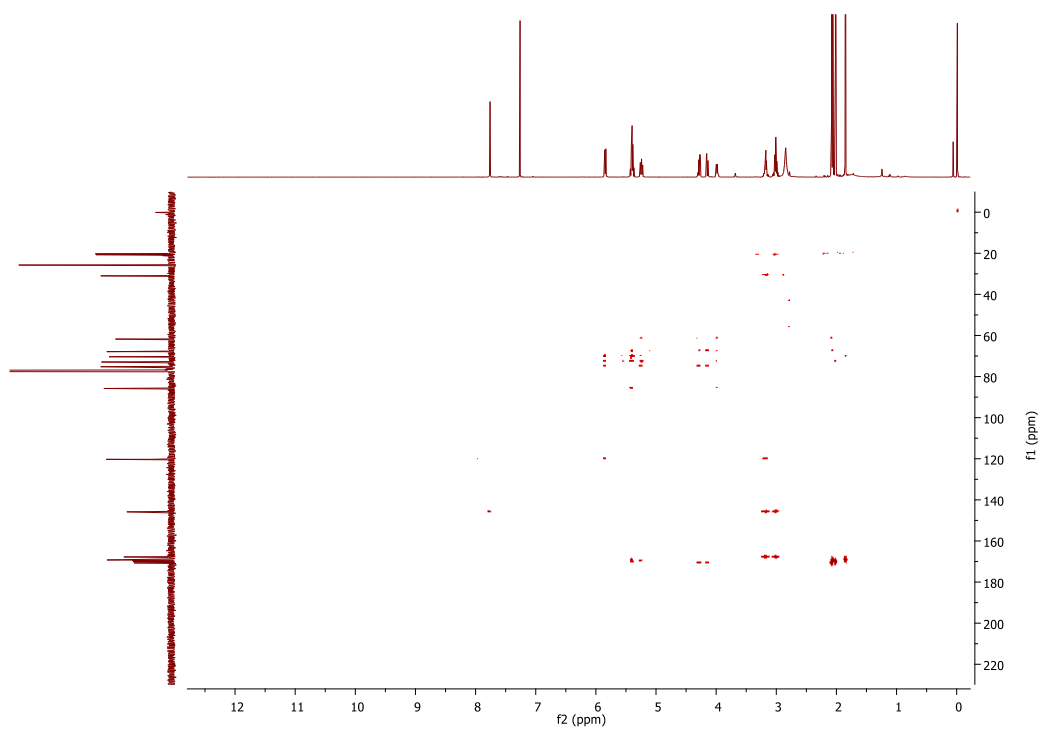

# HR-MS

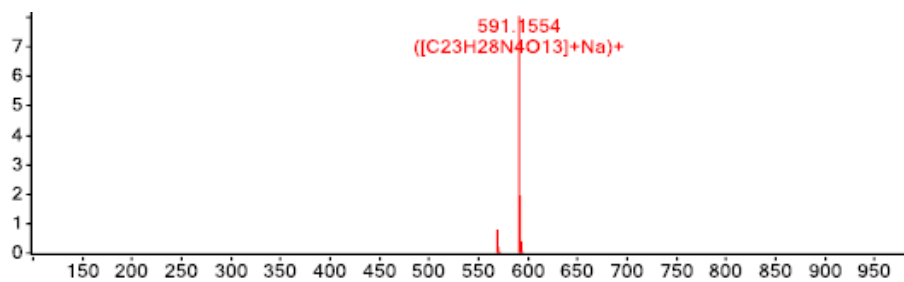

# Compound 12

## $^1\text{H}$ NMR

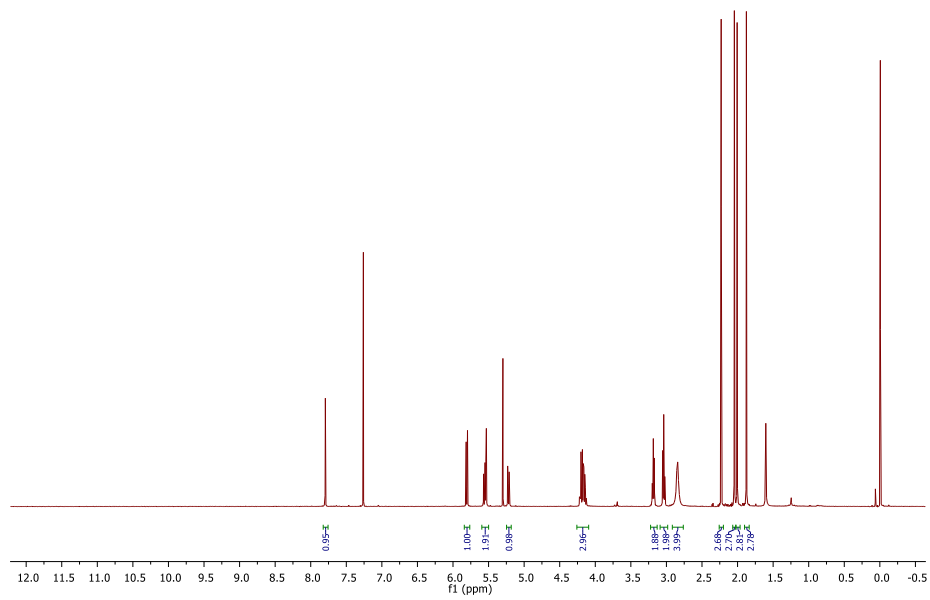

## $^{13}\text{C}$ NMR

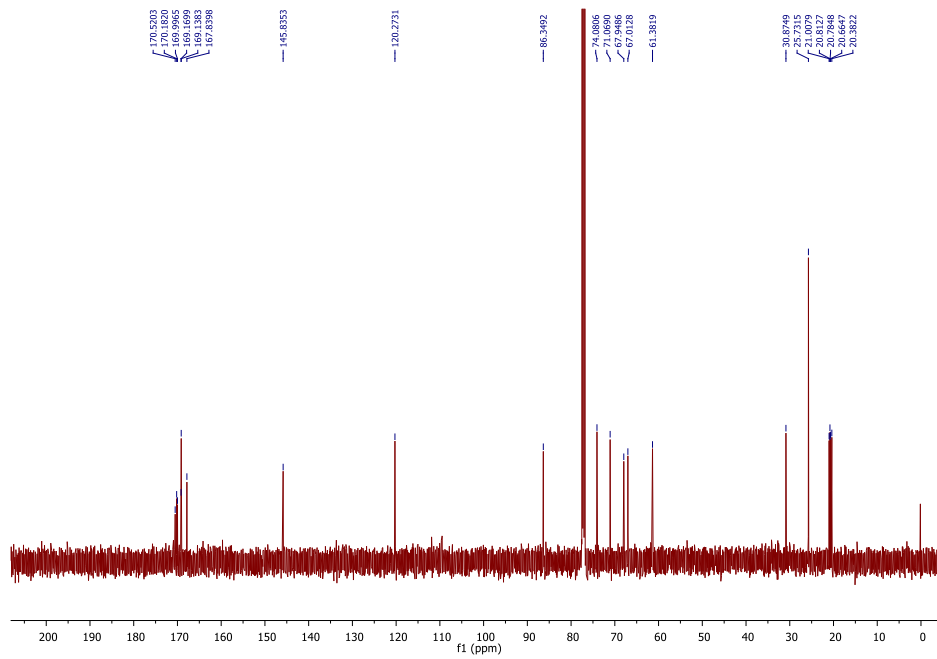



# COSY

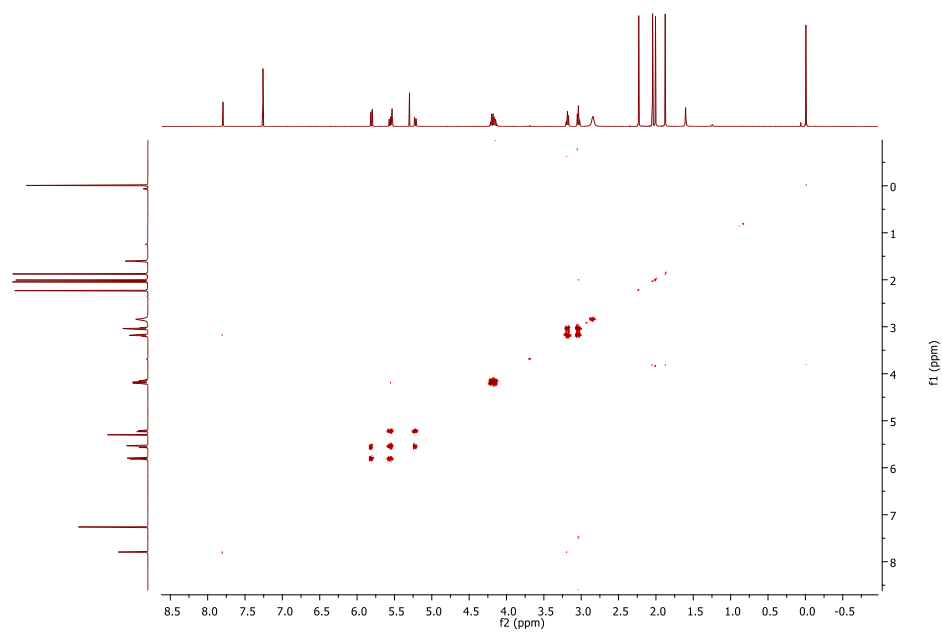

# HSQC

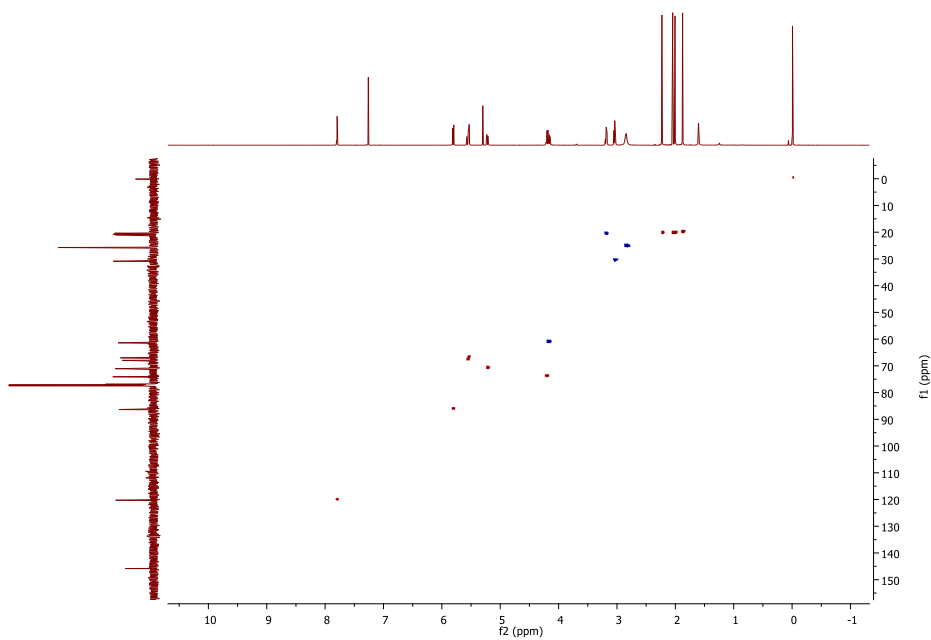

# HMBC

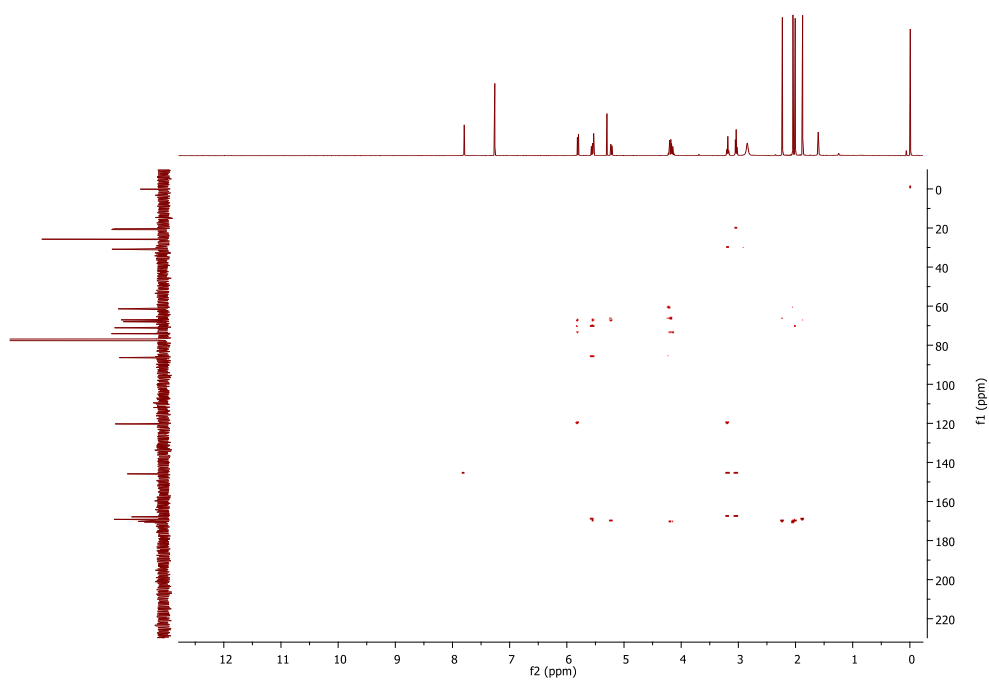

# HR-MS

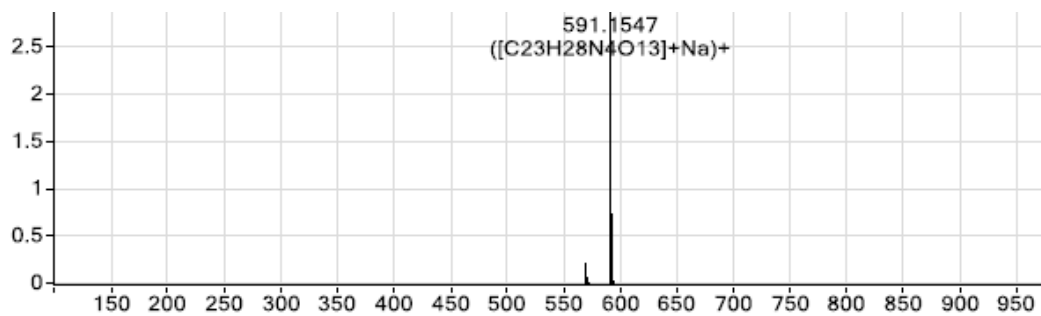

# Compound 19

## $^1\text{H}$ NMR

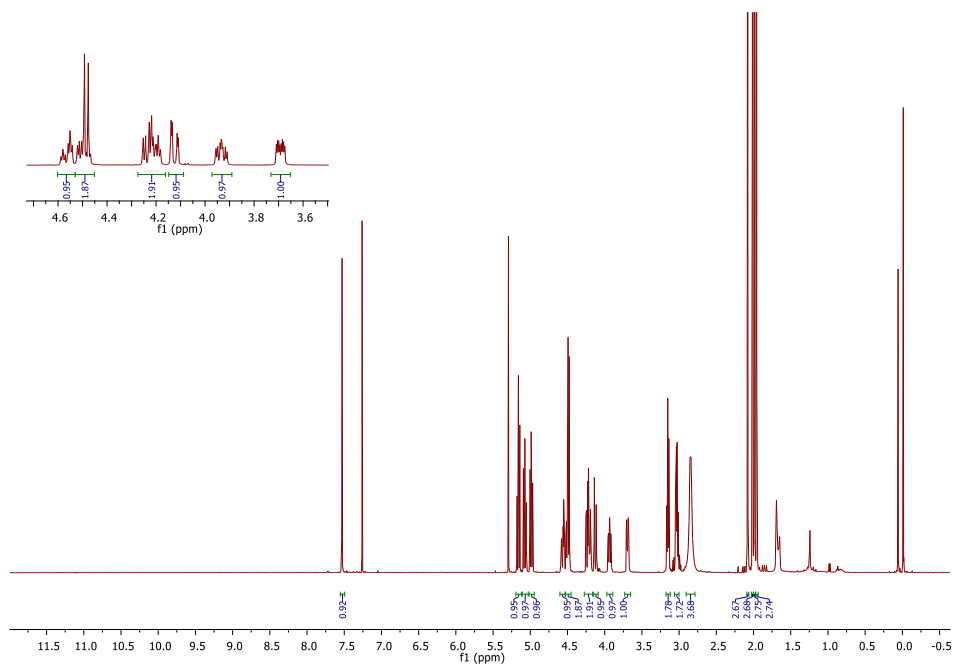

## $^{13}\text{C}$ NMR

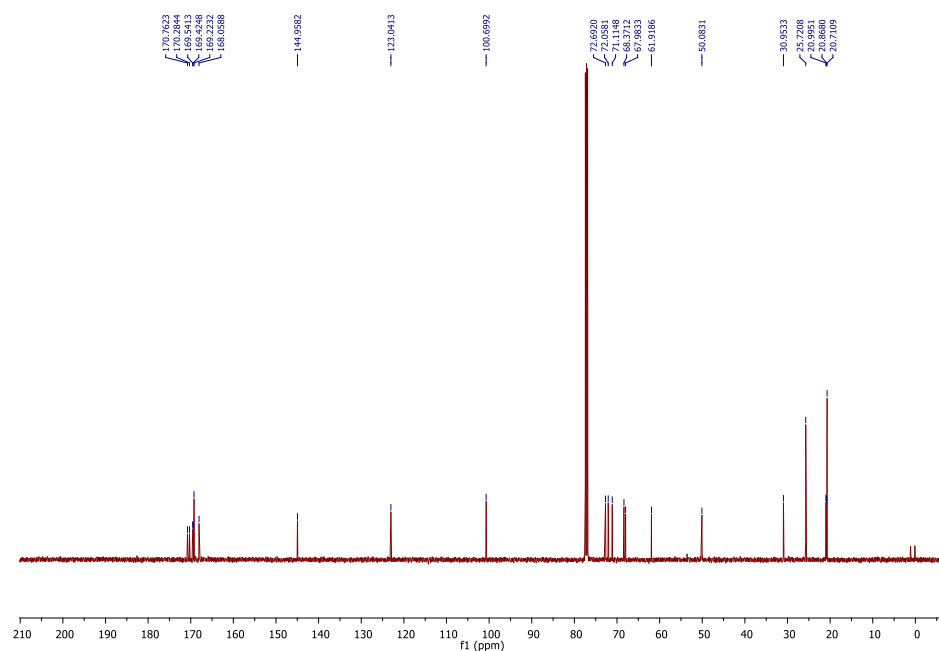

# COSY

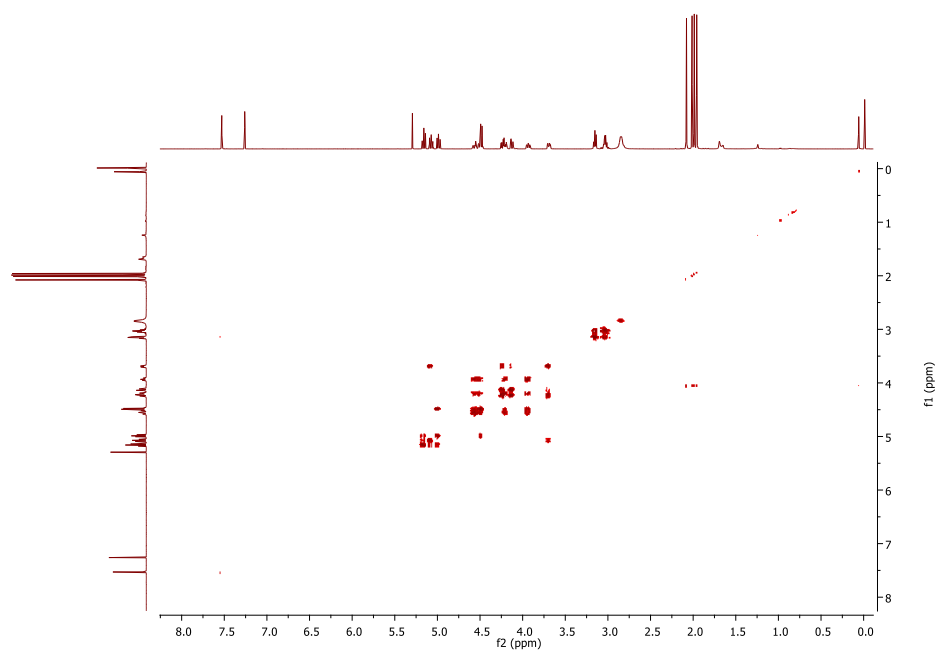

# HSQC

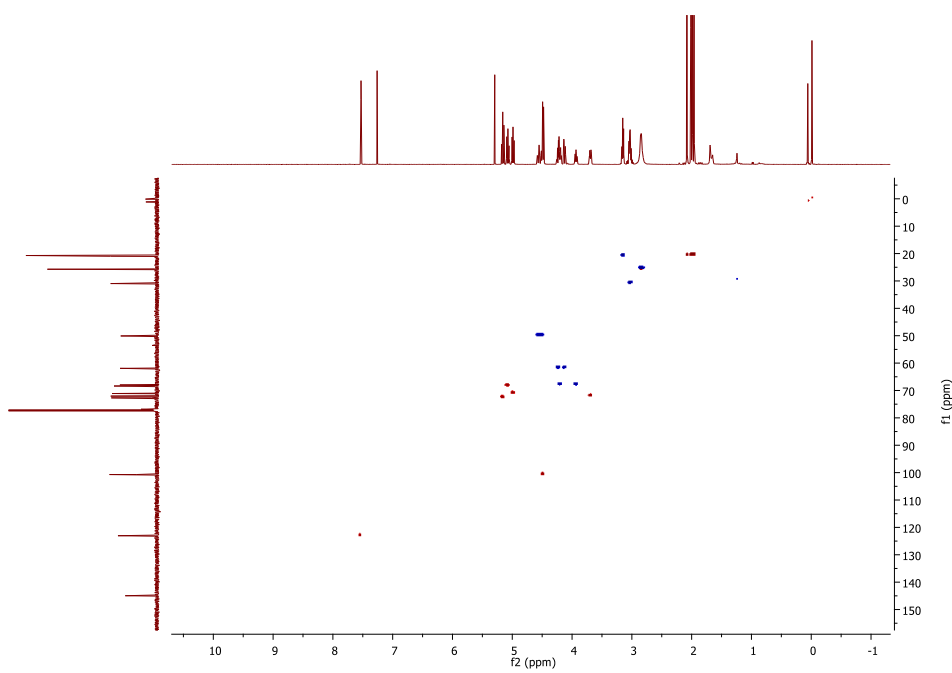

# HMBC

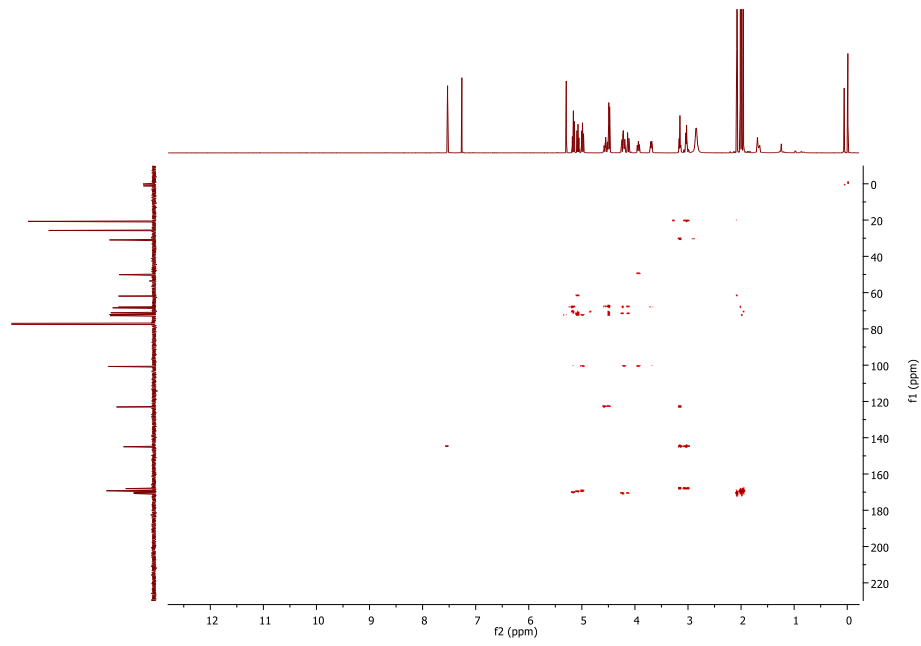

# HR-MS

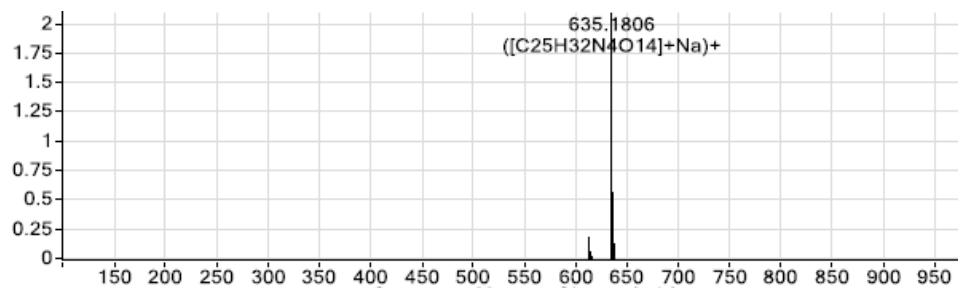

# Compound 20

## $^1\text{H}$ NMR

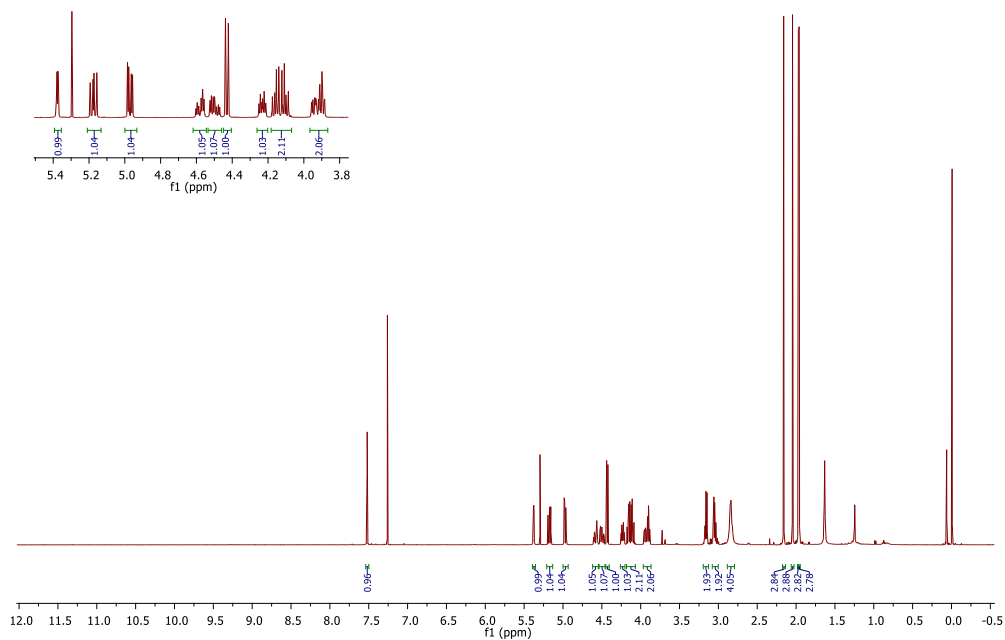

## $^{13}\text{C}$ NMR

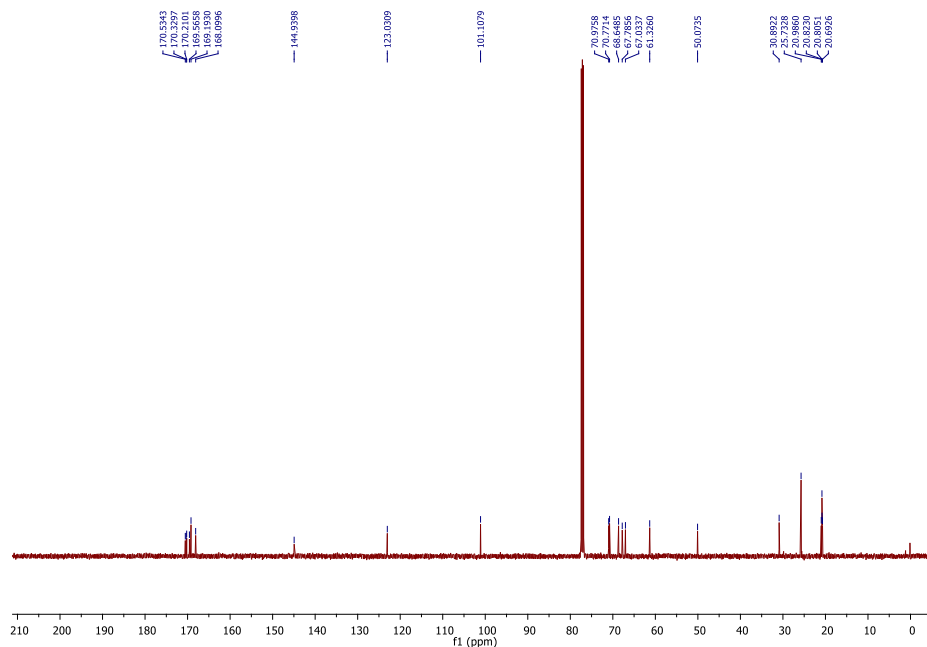

# COSY

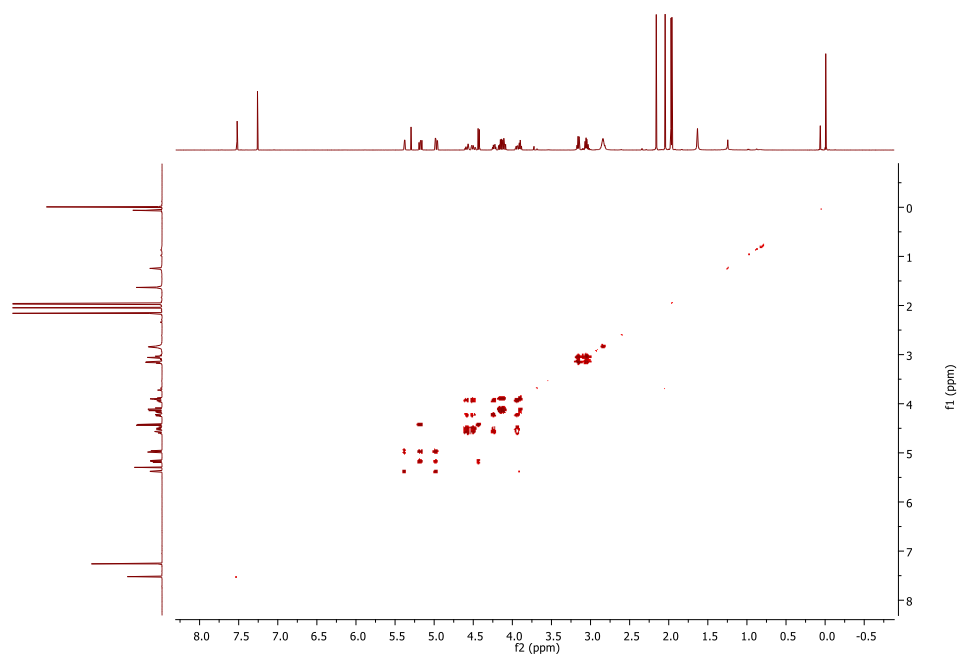

# HSQC

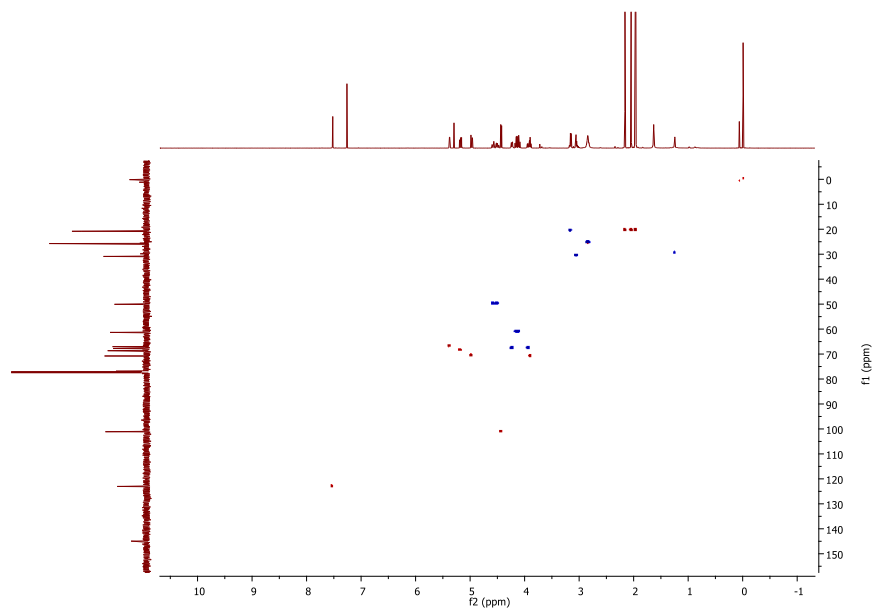

# HMBC

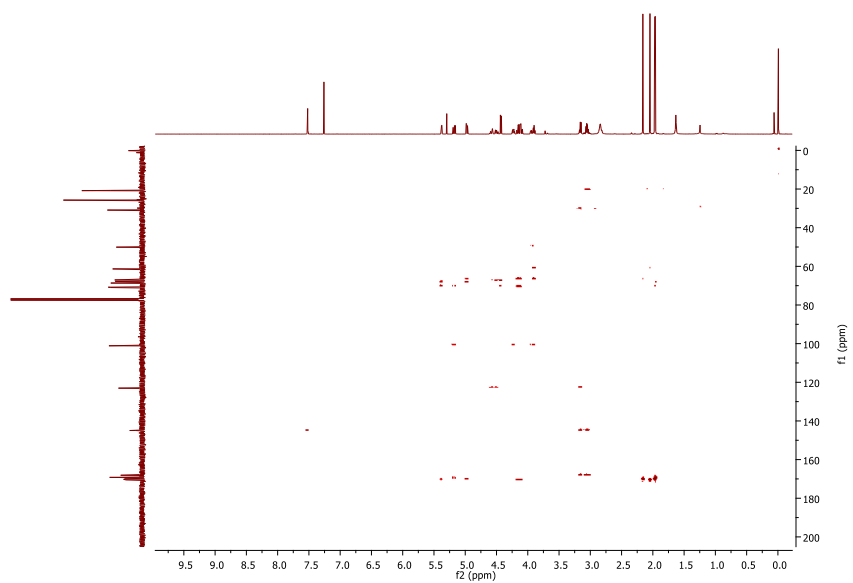

# HR-MS

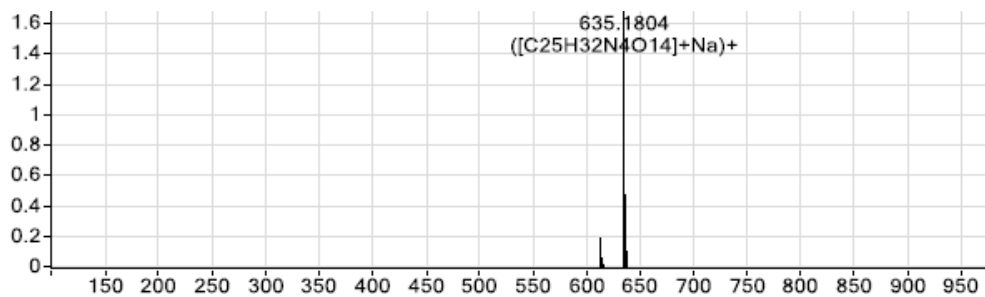



# Complex 1

## $^1\text{H}$ NMR

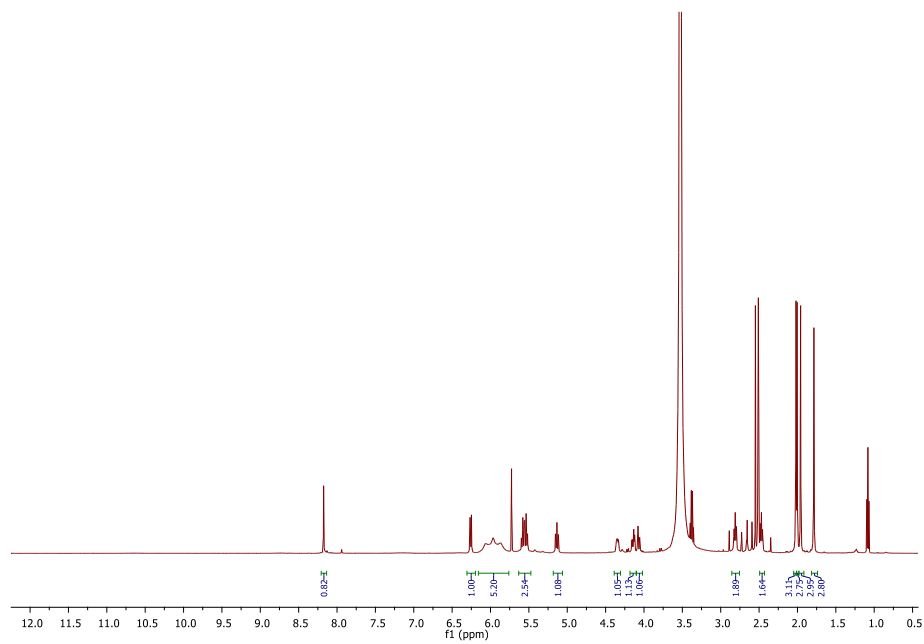

## $^{13}\text{C}$ NMR

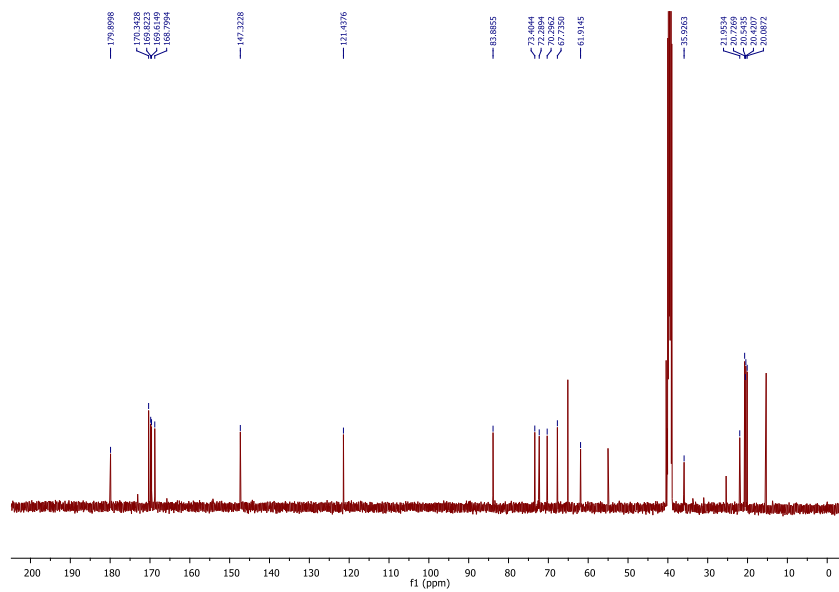

# COSY

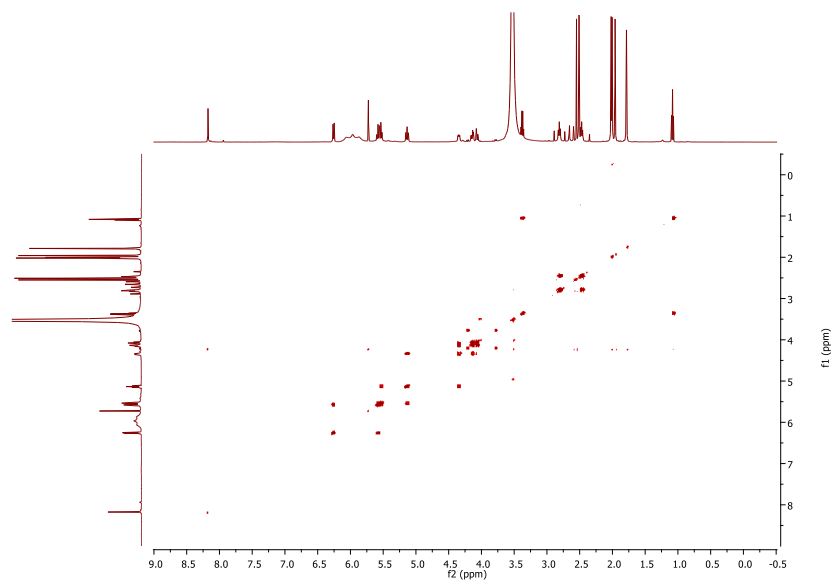

# HSQC

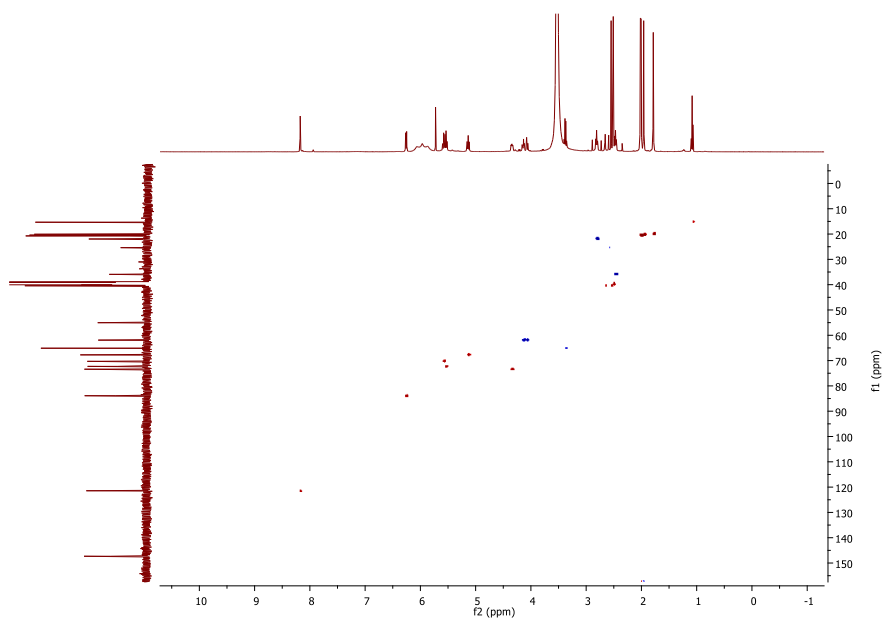

# HMBC

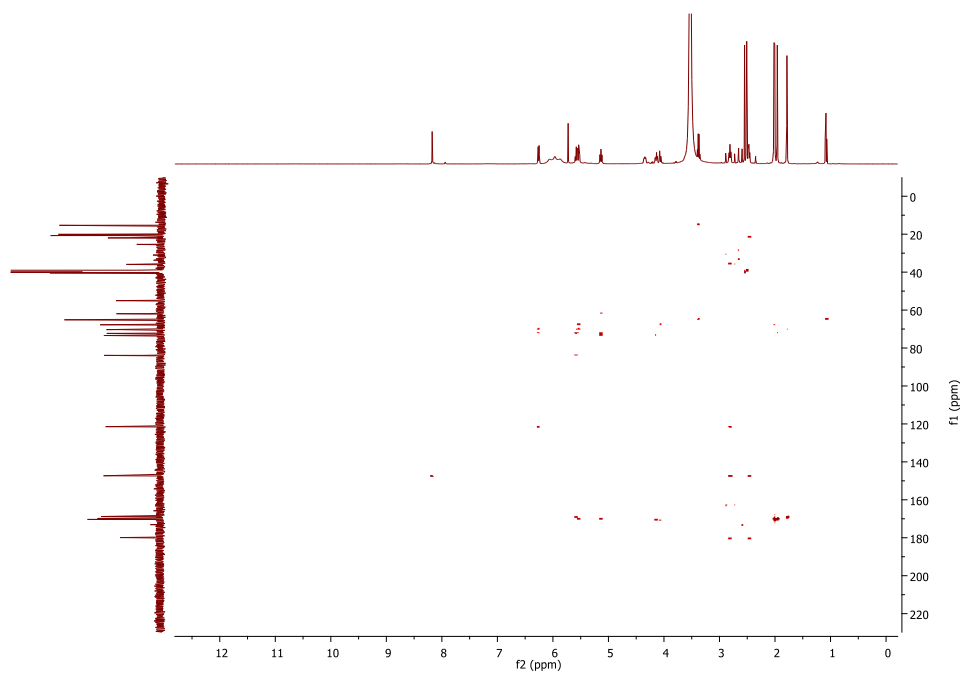

# <sup>195</sup>Pt NMR

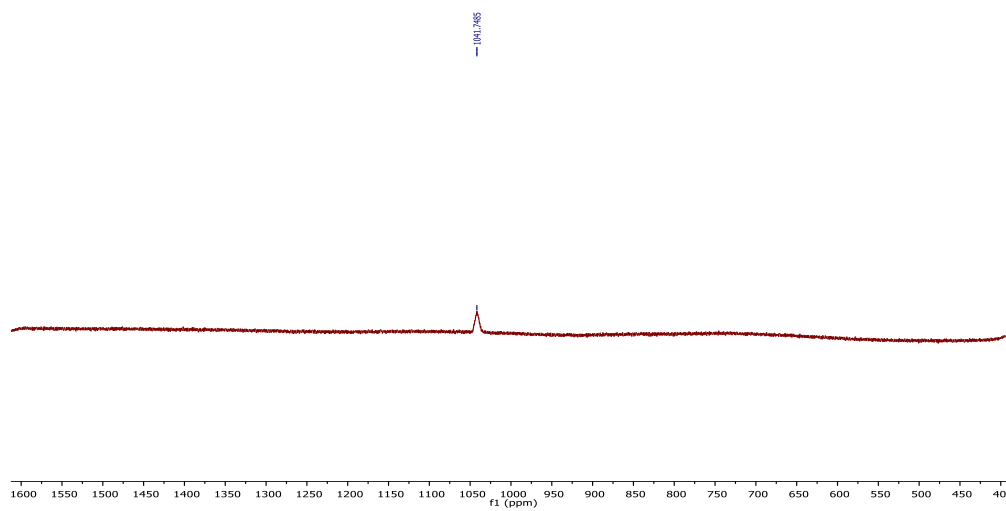

# HR-MS

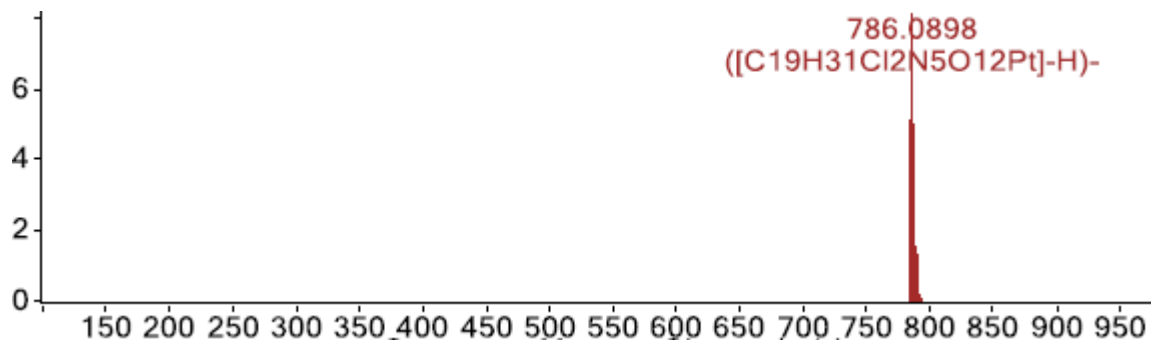

# Complex 2

## $^1\text{H}$ NMR

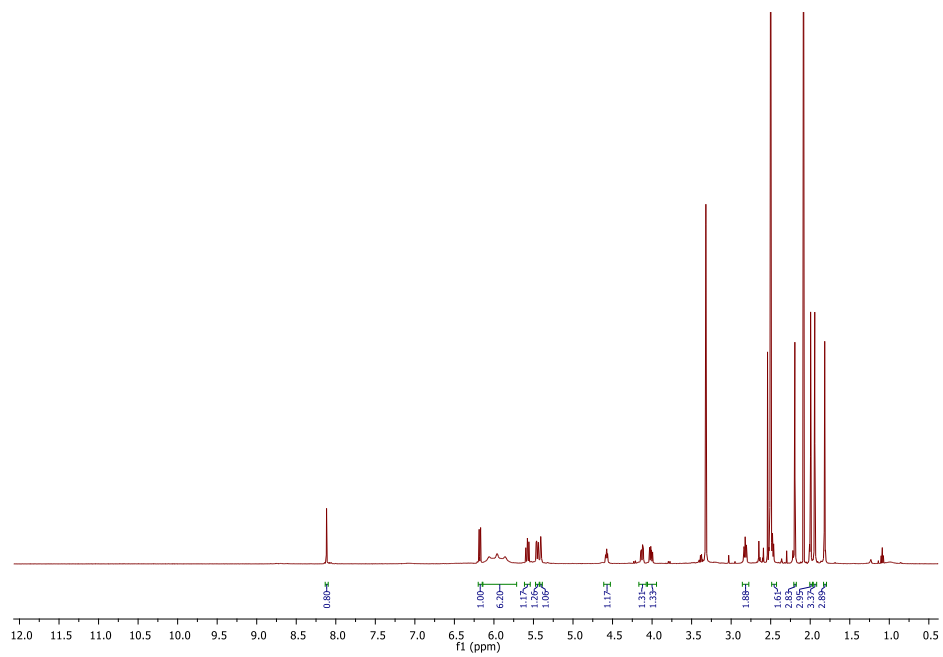

## $^{13}\text{C}$ NMR

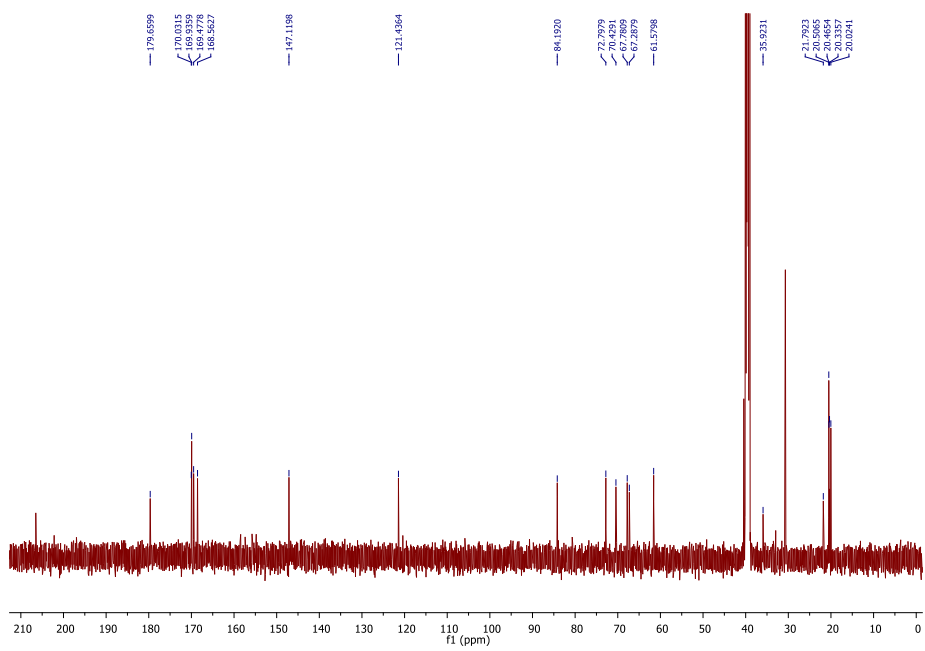

# COSY

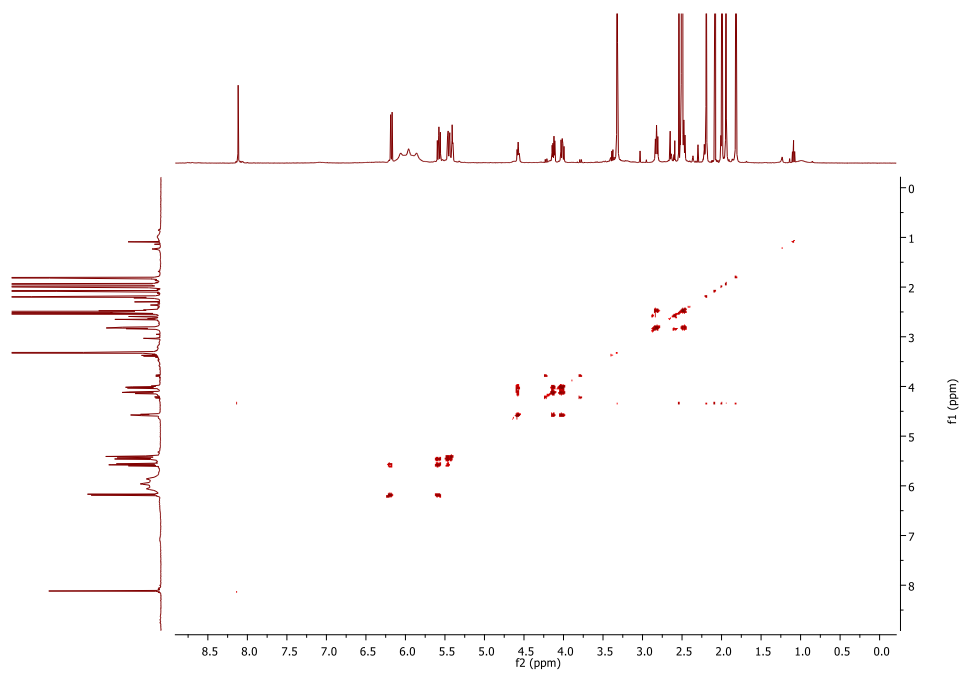

# HSQC

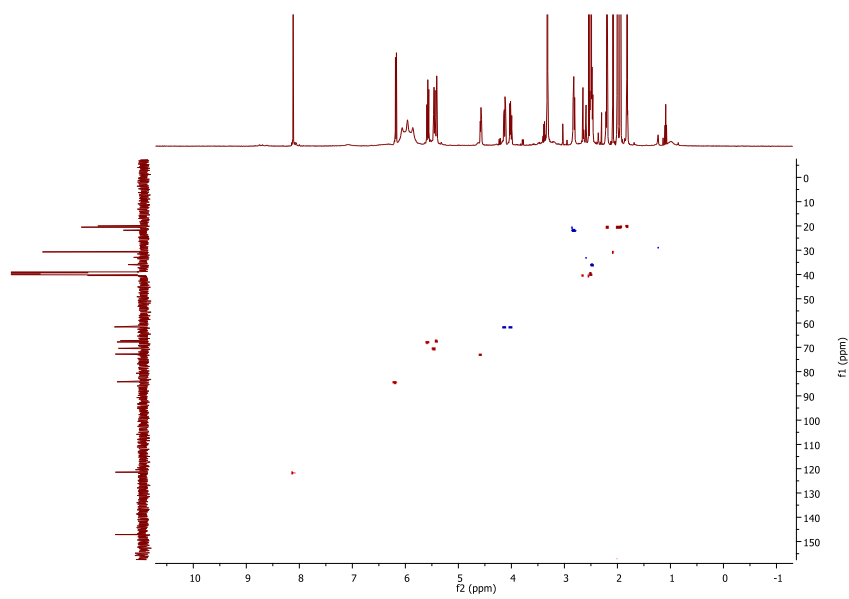

# HMBC

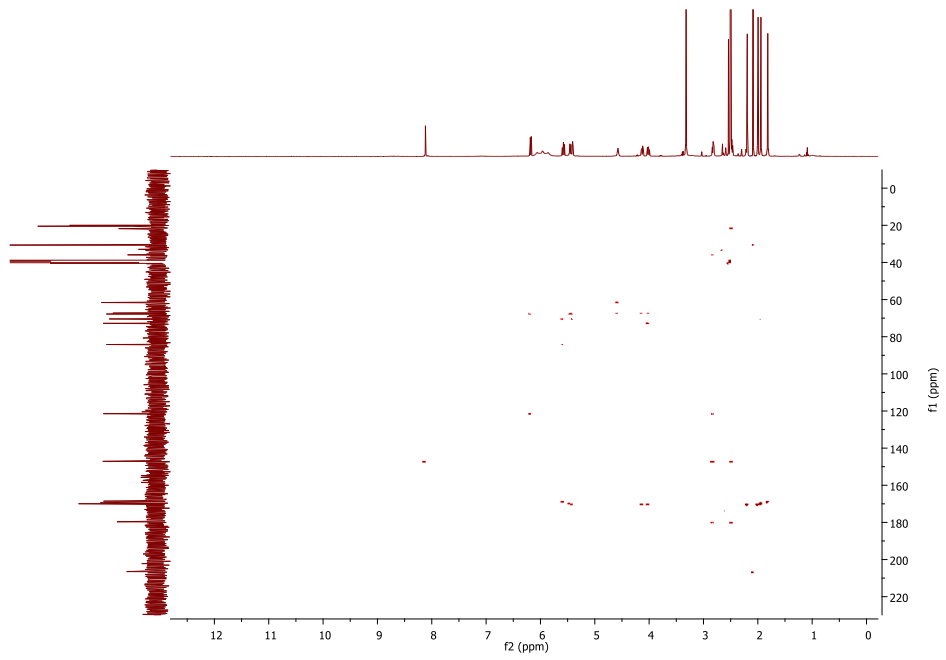

# <sup>195</sup>Pt NMR

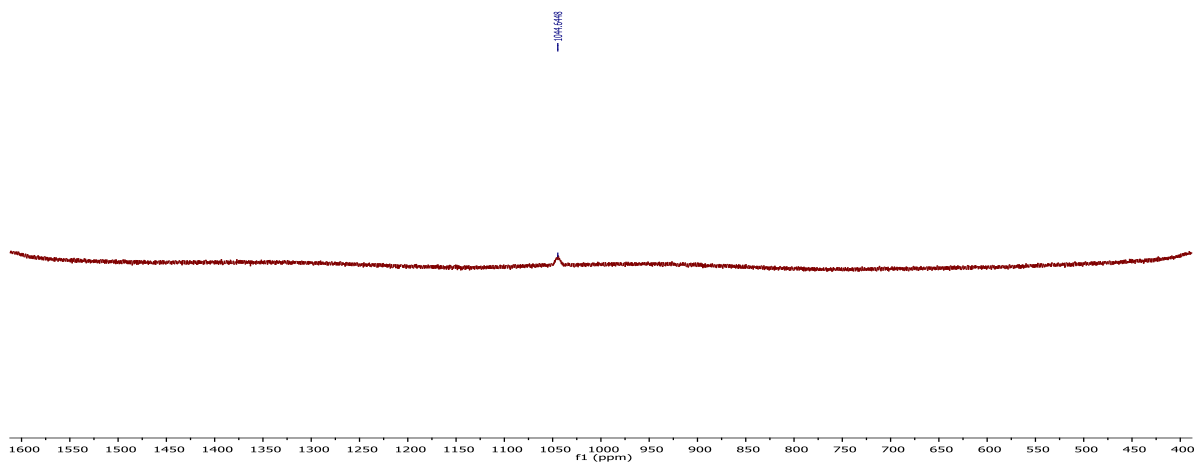

# HR-MS

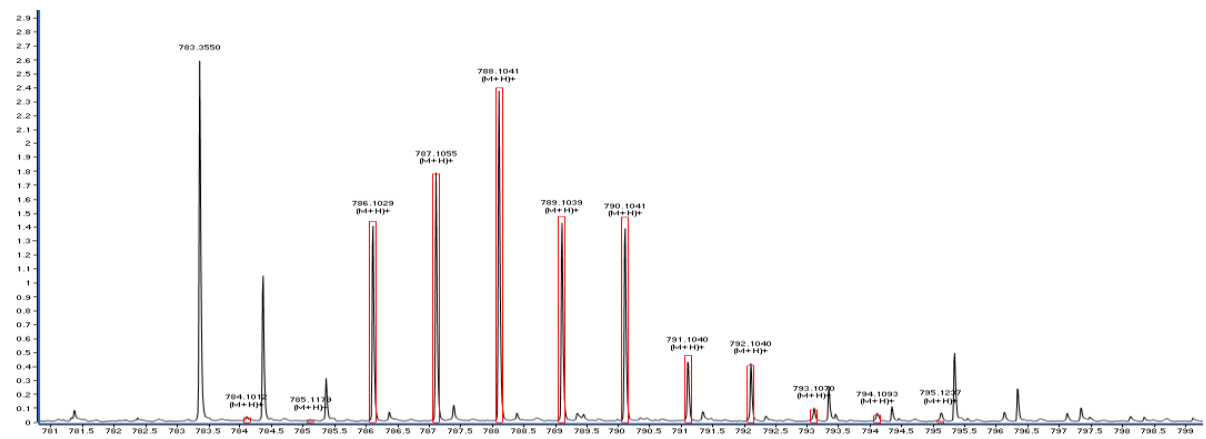

# Complex 3

## $^1\text{H}$ NMR

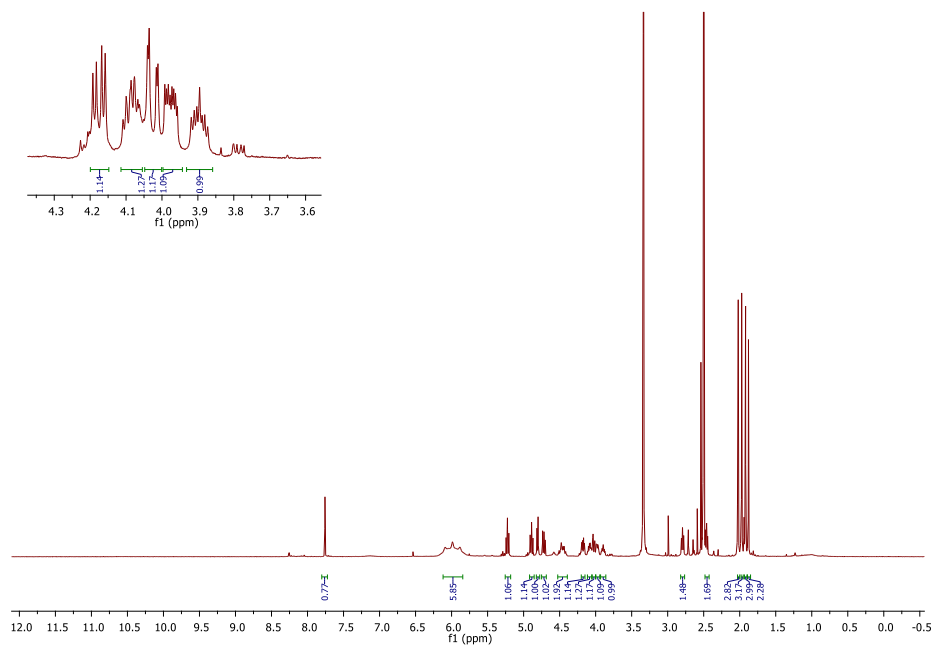

## $^{13}\text{C}$ NMR

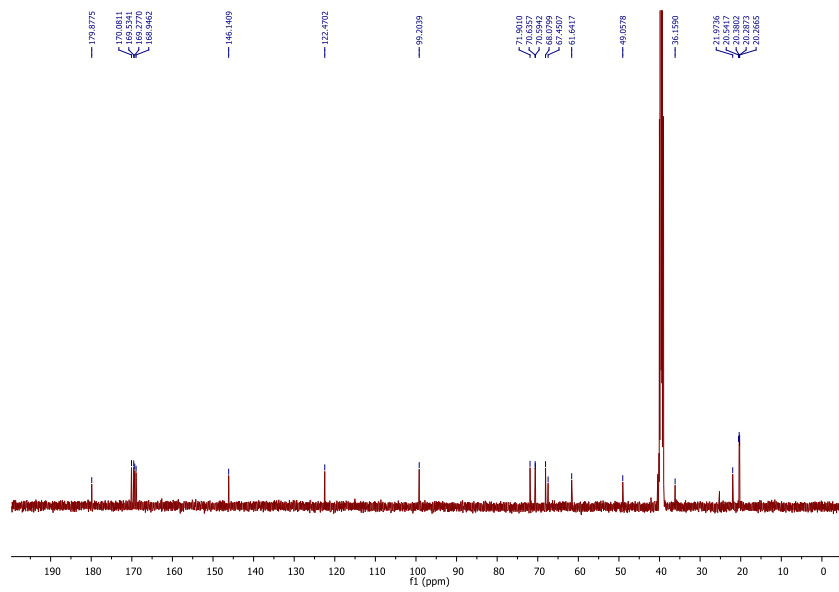

# COSY

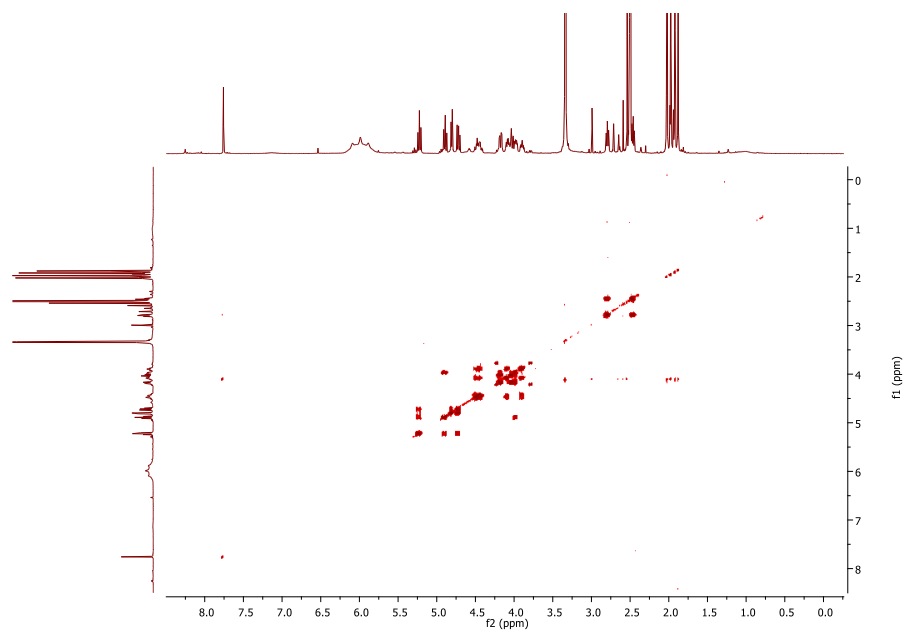

# HSQC

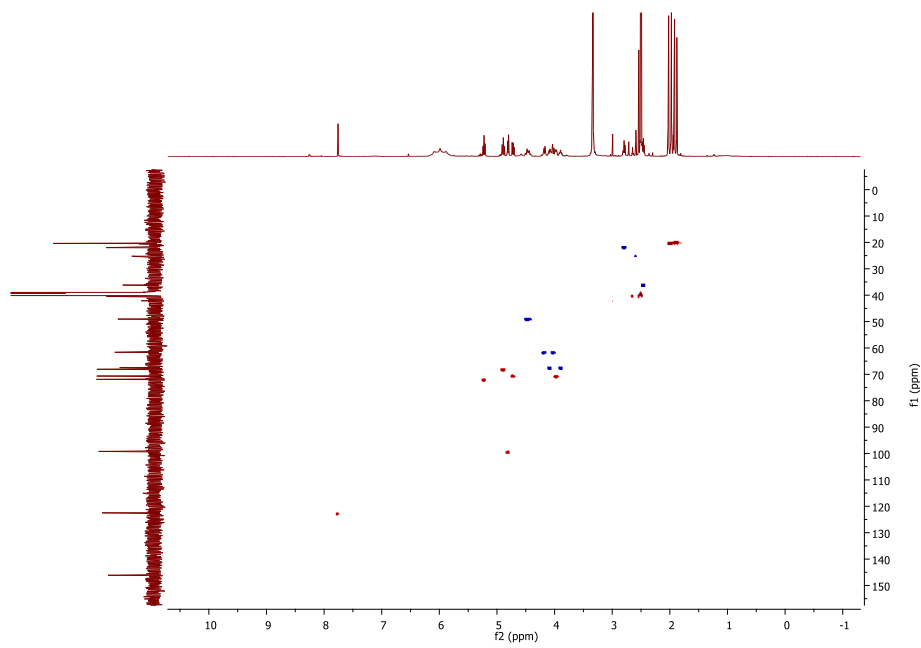



# HMBC

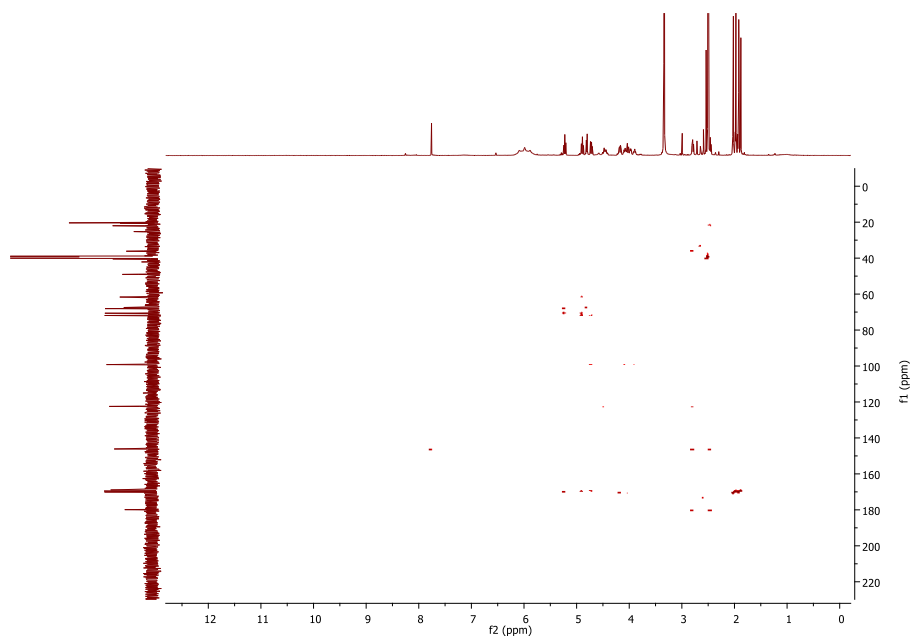

# <sup>195</sup>Pt NMR

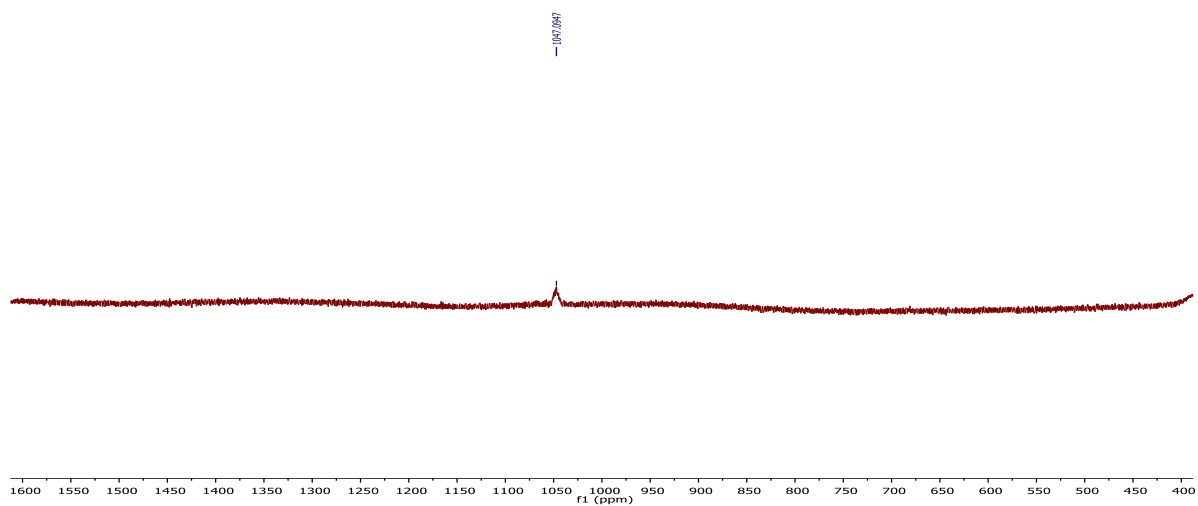

# HR-MS

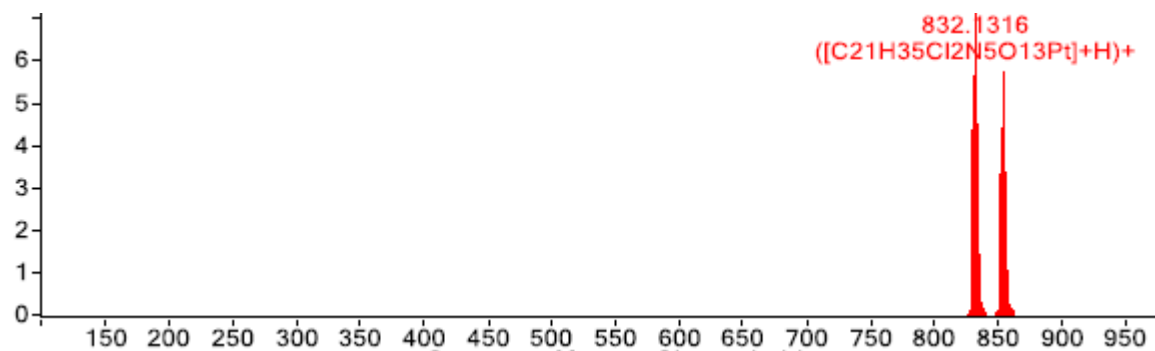

## Complex 4

HPLC. Chromatograms of complex 4 in DMSO/HEPES (pH 6.8): a)  $t = 0$  minutes; b) after one week at r.t.

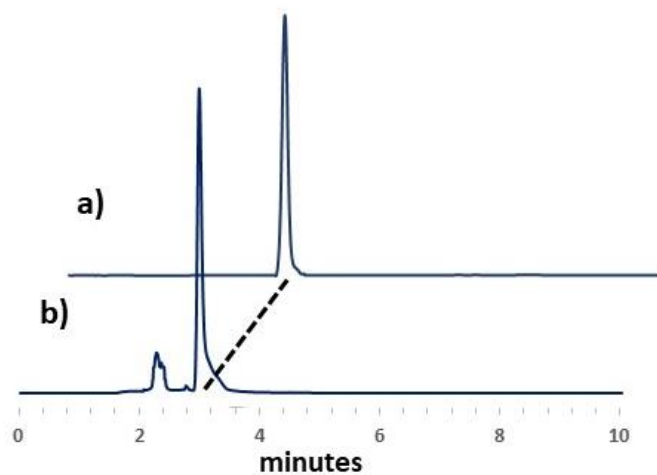

## $^1\text{H}$ NMR

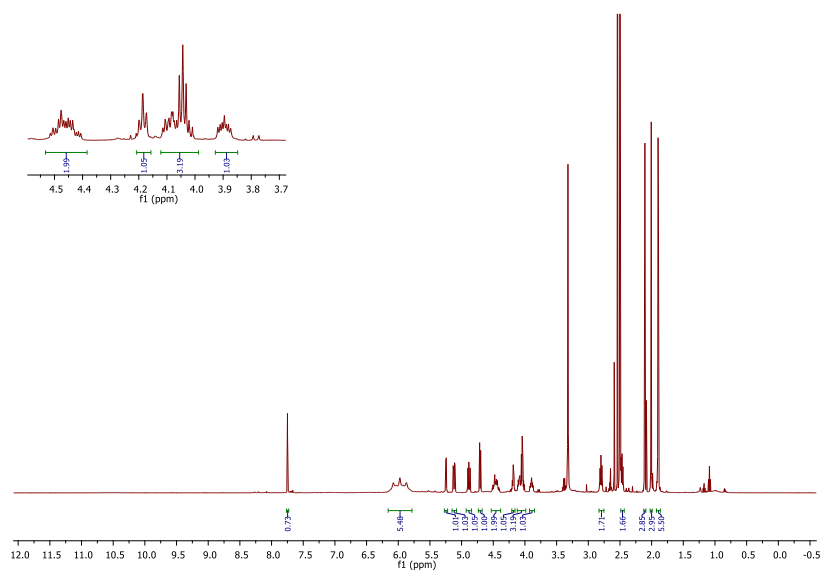

# $^{13}\text{C}$ NMR

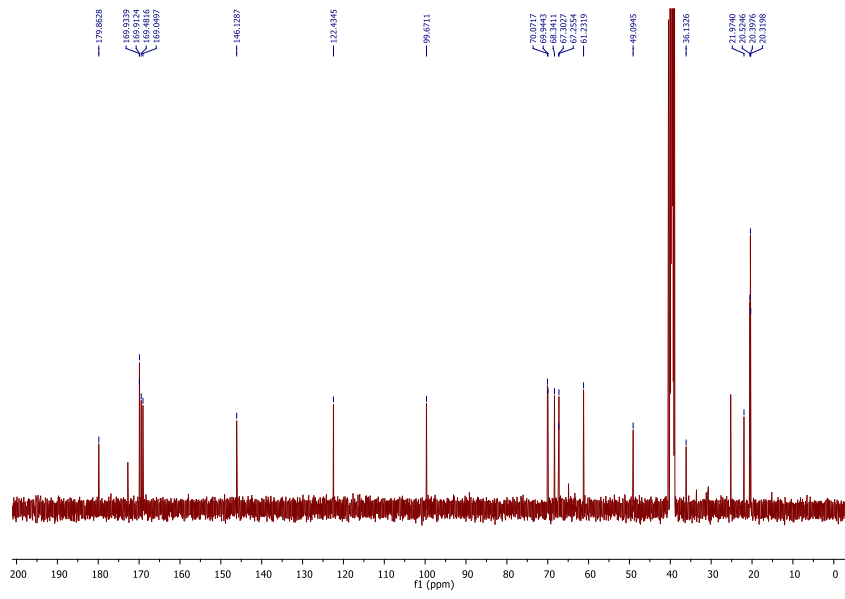

# COSY

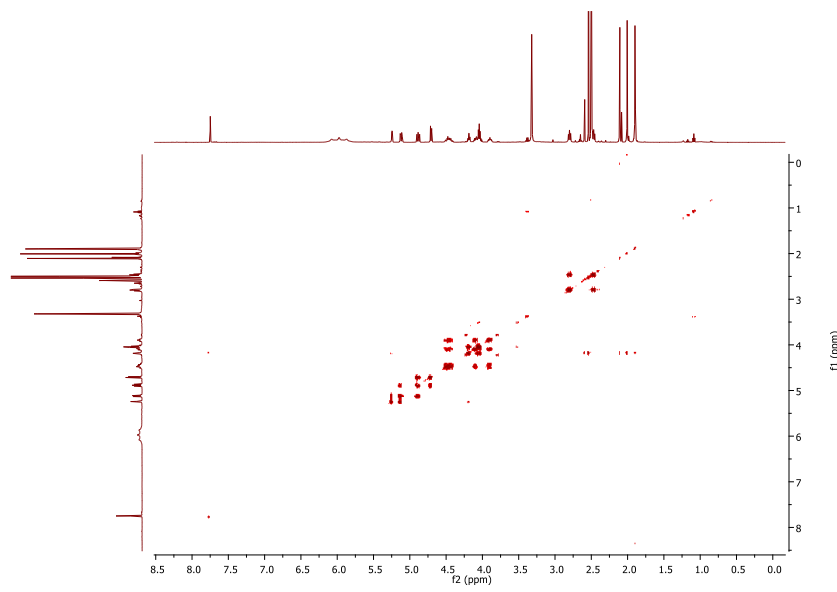

# HSQC

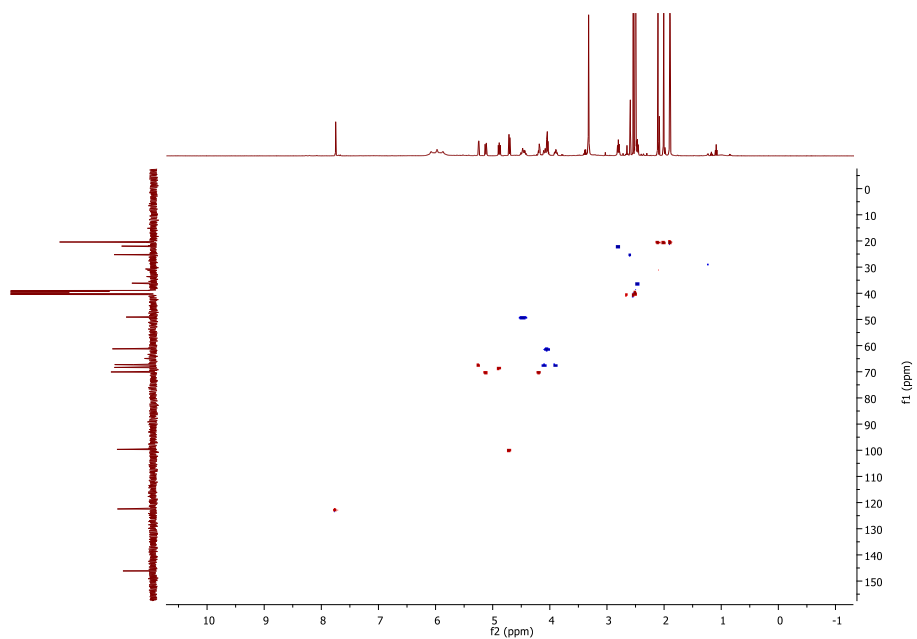

# HMBC

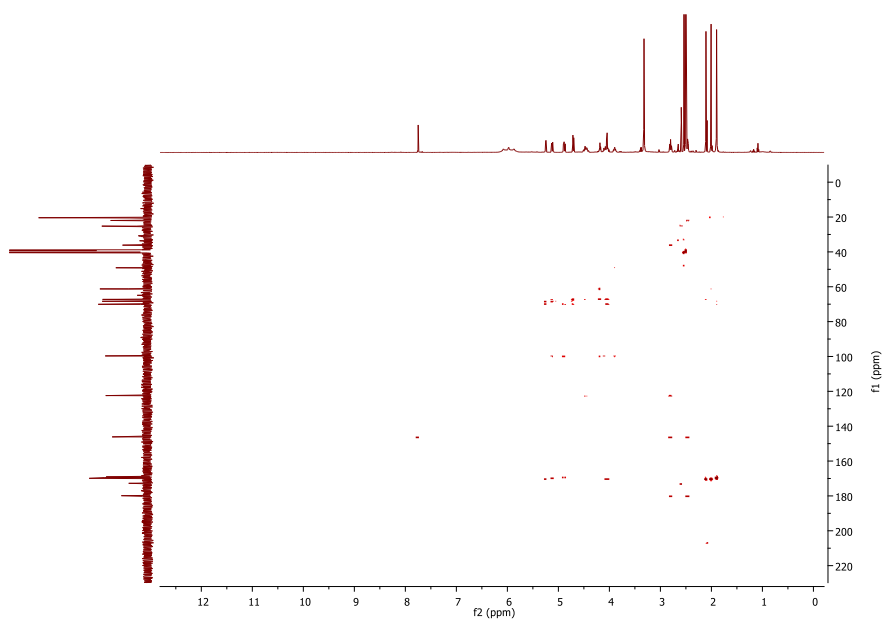

# $^{195}\text{Pt}$ NMR

-087/1536

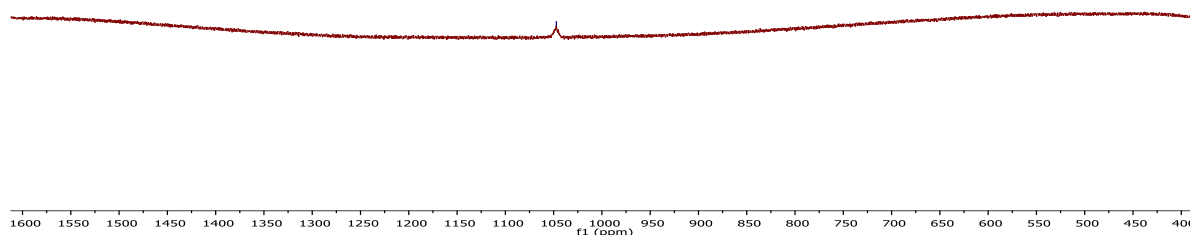

## HR-MS

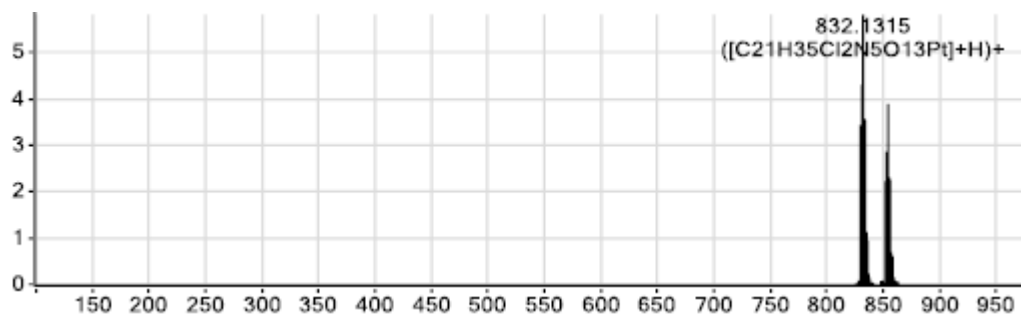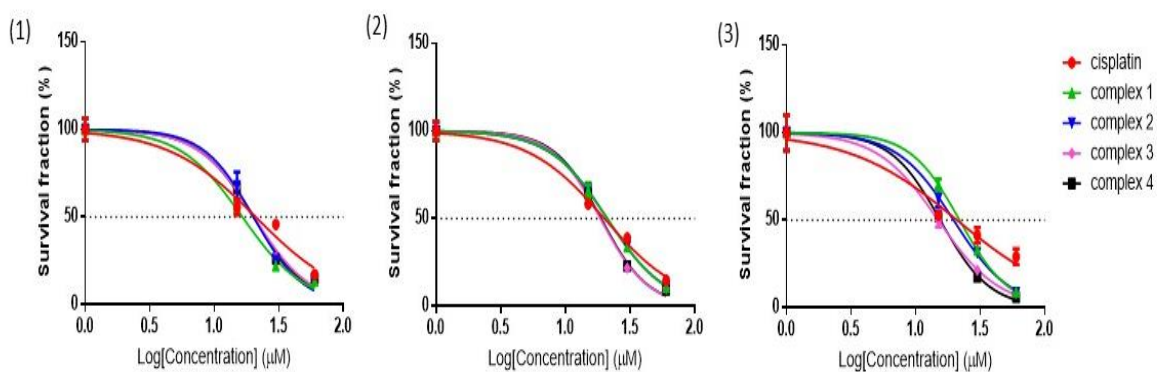

Dose-response curves used to generate  $\text{IC}_{50}$  for cisplatin and complexes **1-4** inhibitor activity on viability of SAOS-2 (1), U-2 OS (2) and MG63 (3) cell lines. Log[concentration] in  $\mu\text{M}$  and the normalized response (%) of survival fraction of cells are reported on X and Y axes, respectively. 50% survival cells is highlighted in Y dotted line. For each cell line, curves interpolation with 50% survival cells correspond to  $\text{LogIC}_{50}$  of each drug. Data are reported in the graph as mean  $\pm$  standard deviation. For  $\text{IC}_{50}$  values see table 1.
